# Supplementary material for: Comparative Analysis of Flower Volatiles from Nine Citrus at Three Blooming Stages
Source: PubMed Central journal article supplement (PMC3856067; doi:10.3390/ijms141122346), 2013-11-13

# Supplementary Materials

**Figure S1.** Chromatogram of E-Nose and gaschromatography-mass spectrometry (GC-MS) from nine cultivars during flower development.

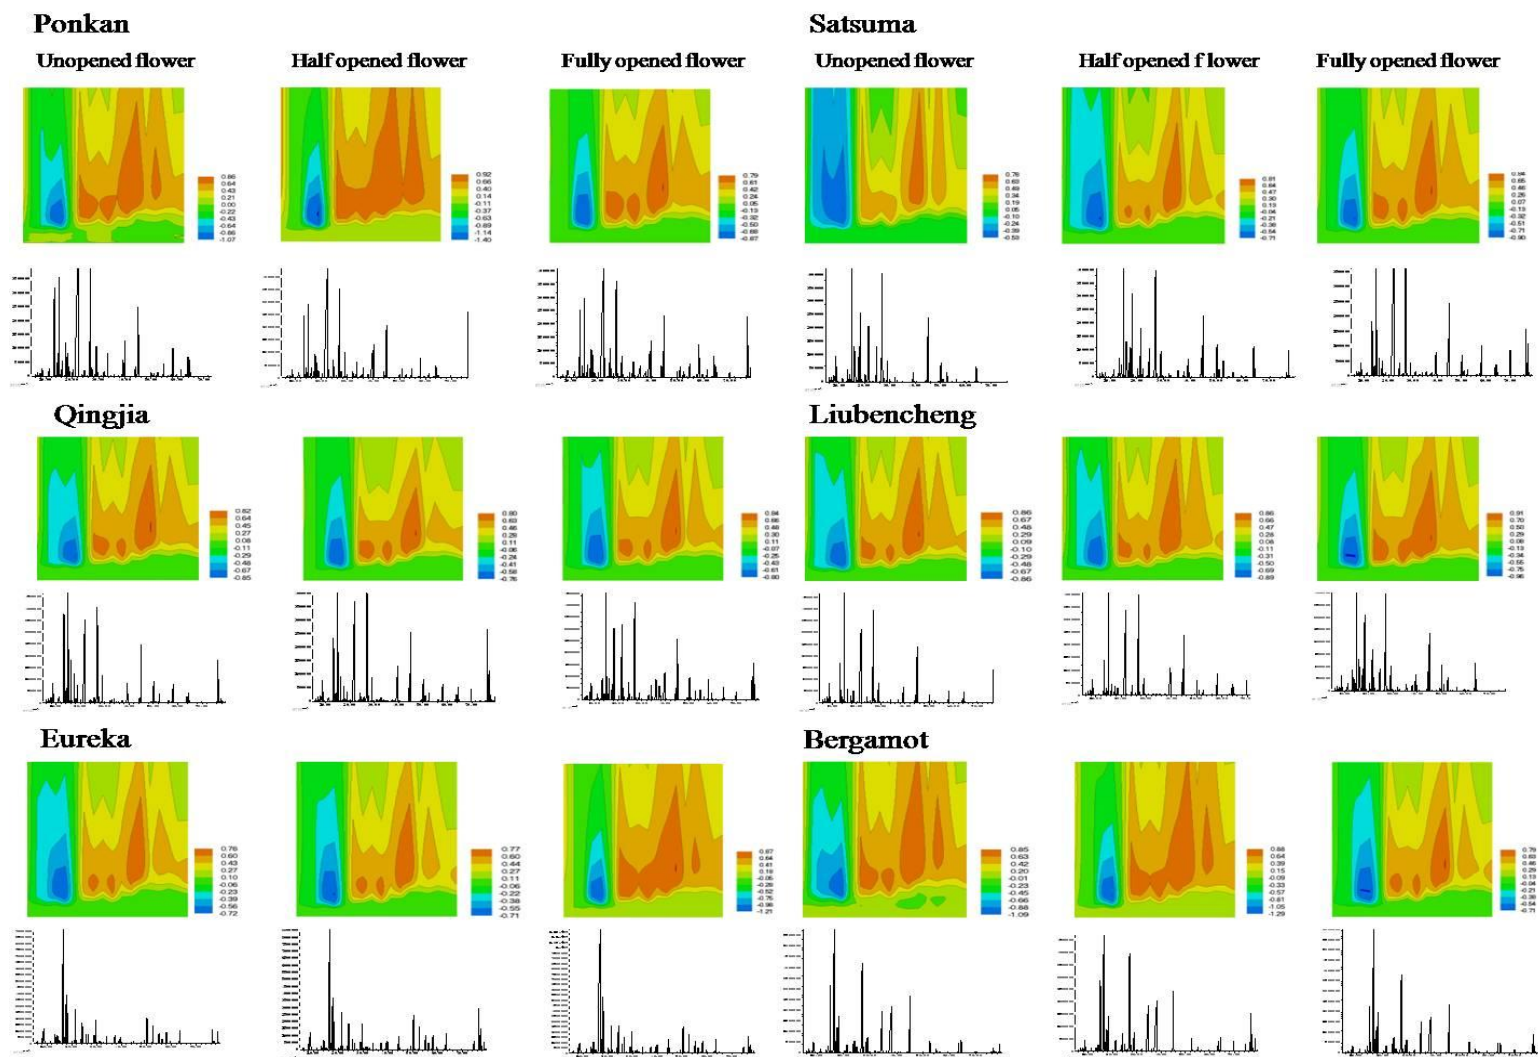

Figure S1. Cont.

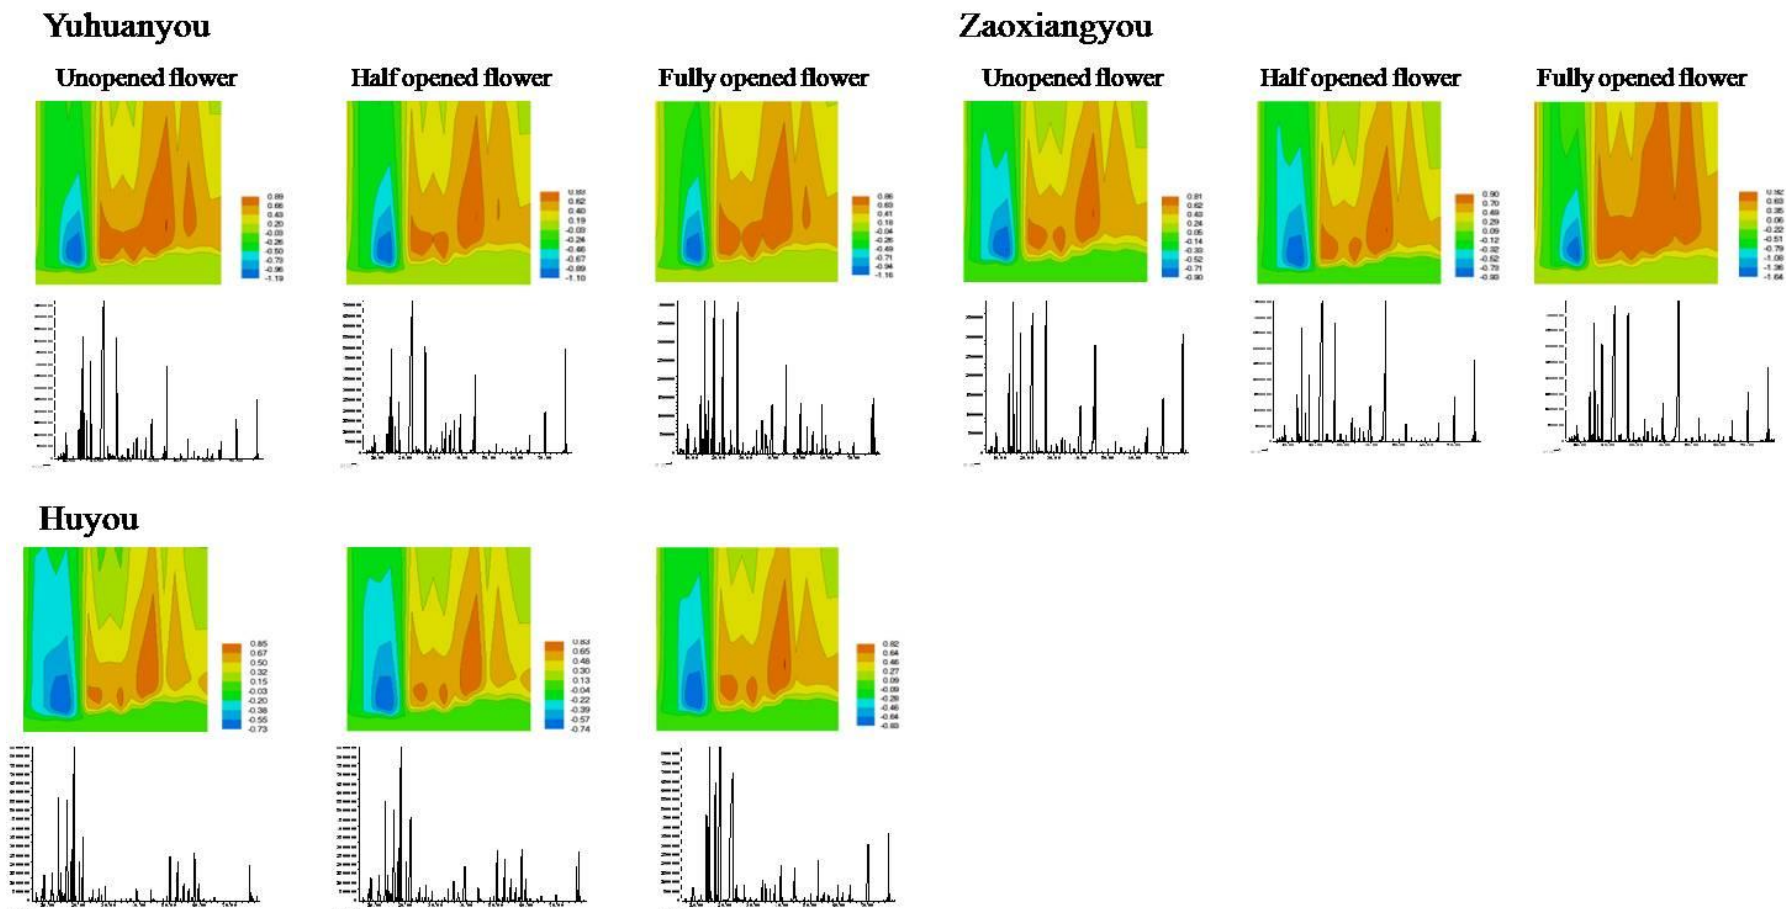

Supplement: ijms-14-22346-s001.pdf [file ijms-14-22346-s001.pdf]
