# Supplementary material for: Comparative Analysis of Flower Volatiles from Nine Citrus at Three Blooming Stages
Source: MDPI journal article supplement (doi:10.3390/ijms141122346), 2013-11-13
Supplement: s2 [file s2]

## Sheet: Sheet1
Table S1. Flowere volatiles identified by peak area percentage in unopened (U), half opened (H) and fully opened (F) flowers from five citrus types.
					Ponkan						Satsuma						Liubencheng						Qingjia						Lemon						Bergarmot						Yuhuanyou						Zaoxiangyou
RI a	RT b	Compounds	FC c	I M d	Ponkan-U e	SDf	Ponkan-H	SD	Ponkan-F	SD	Satsuma-U	SD	Satsuma-H	SD	Satsuma-F	SD	Liubencheng-U	SD	Liubencheng-H	SD	Liubencheng-F	SD	Qingjia -U	SD	Qingjia-H	SD	Qingjia-F	SD	Lemon-U	SD	Lemon-H	SD	Lemon-F	SD	Bergarmot-U	SD	Bergarmot-H	SD	Bergarmot-F	SD	Yuhuanyou-U	SD	Yuhuanyou-H	SD	Yuhuanyou-F	SD	Zaoxiangyou-U	SD	Zaoxiangyou-H
808.912	5.984	Hexanal	A1	RI, MS	0.476339	0.0789479	0.41152	0.0310725	-g	-	-	-	-	-	-	-	-	-	-	-	-	-	-	-	-	-	0.923401	0.0766175	0.797268	0.0299442	0.700028	0.0376345	0.418498	0.0626353	-	-	-	-	0.485007	0.0332928	0.651812	0.0776258	0.369235	0.0492781	0.852767	0.0759386	0.675039	0.0276241	0.551865
858.342	7.892	2-hexenal *	A2	RI, MS	0.618401	0.0115423	-	-	0.292523	0.00293911	2.84266	0.26512	1.84131	0.124567	0.91068	0.093476	2.36084	0.240722	1.68436	0.0609212	1.18828	0.0516389	1.51037	0.131113	1.20441	0.0675747	1.86282	0.116065	1.3299	0.056576	1.44685	0.120849	0.887701	0.0947965	0.640682	0.00740472	0.815563	0.0454114	0.819271	0.00757154	0.932662	0.0940297	0.682394	0.00392213	1.68143	0.0576518	0.880055	0.118057	0.841289
977.267	12.534	Benzaldehyde	A3	RI, ST, MS	0.0365311	0.0022122	0.0752247	0.00465824	0.101367	0.00517864	0.0923584	0.0375751	0.175594	0.0092918	0.0541571	0.00273774	0.0867234	0.01029	0.0686918	0.00413948	0.0589033	0.00125118	-	-	-	-	0.111711	0.0209265	0.050137	0.00232885	0.0512928	0.00320891	0.0272766	0.00362298	-	-	-	-	-	-	-	-	0.0220344	0.00735562	0.093657	0.00362061	-	-	-
1047.63	17.456	Benzeneacetaldehyde *	A4	RI, MS	0.0961463	0.00556476	0.893188	0.0876987	1.07755	0.172728	-	-	-	-	-	-	0.171629	0.00298966	0.650584	0.0538099	0.993893	0.00668671	-	-	0.346999	0.0377023	1.31153	0.287398	-	-	0.250061	0.0238266	0.199589	0.0280681	-	-	-	-	-	-	-	-	-	-	1.33903	0.0975836	-	-	-
1109.17	21.584	Nonanal	A5	RI, MS	-	-	-	-	-	-	-	-	-	-	-	-	-	-	-	-	-	-	-	-	-	-	-	-	-	-	-	-	-	-	0.200073	0.0134877	0.189628	0.0064992	0.173524	0.00827304	-	-	-	-	-	-	-	-	-
1154.36	25.547	Lilac aldehyde B *	A6	RI, MS	-	-	-	-	-	-	-	-	-	-	0.0311599	0.00161623	-	-	0.0422358	0.00151807	0.032405	0.000522326	-	-	0.0362157	0.00403578	-	-	-	-	-	-	-	-	-	-	-	-	-	-	0.185446	0.0108329	0.0359671	0.00709479	-	-	0.0962789	0.00116462	0.0455071
1201.85	29.743	Myrtenal	A7	RI, MS	-	-	-	-	-	-	0.592281	0.0587396	0.381746	0.0148487	-	-	-	-	-	-	-	-	0.104055	0.00227437	-	-	-	-	-	-	-	-	-	-	-	-	-	-	-	-	-	-	0.045366	0.00353231	-	-	0.0742987	0.00103862	-
1213.53	30.96	Decanal	A8	RI, MS	0.047076	0.000847531	0.0353119	0.00345366	0.030824	0.00877716	0.0514832	0.0445888	0.0890234	0.0414784	-	-	-	-	-	-	-	-	0.0361339	0.00266703	0.02745	0.00177766	-	-	0.124859	0.00378446	0.0985265	0.00388351	0.0620048	0.00377028	-	-	-	-	-	-	0.560346	0.0214985	0.358077	0.0197693	-	-	0.0199622	0.000960484	-
1311.25	41.228	Undecanal	A9	RI, MS	-	-	-	-	-	-	-	-	-	-	-	-	-	-	-	-	-	-	-	-	-	-	-	-	0.057423	0.000970565	-	-	0.667219	0.501672	0.0907533	0.00425284	0.0815354	0.00164589	0.0752743	0.00620926	-	-	-	-	-	-	-	-	-
		Monoterpene hydrocarbons
938.506	11.012	α-thujene	Mh1	RI, MS	0.468747	0.069986	0.415145	0.0384684	0.334199	0.00979348	0.397186	0.109176	0.464473	0.0291375	0.252603	0.00915919	0.61661	0.0719687	0.341349	0.0230708	0.213765	0.015801	0.643046	0.0584472	0.424244	0.0315712	0.617307	0.0319958	0.0909557	0.00156595	0.0768454	0.00518072	0.122778	0.00677875	0.144167	0.0192557	0.152313	0.00616505	0.184655	0.0141639	-	-	0.0143789	0.00215873	2.18061	0.279121	0.0892216	0.00362246	0.0261096
945.025	11.268	α-pinene	Mh2	RI, ST, MS	0.964266	0.0897815	0.791216	0.120607	0.676078	0.0400087	1.07716	0.326441	2.79759	2.32009	0.379974	0.021303	0.74268	0.0861278	0.350972	0.0208532	0.350961	0.0628171	0.850224	0.0772505	0.51823	0.028486	1.41559	0.396767	0.497029	0.0154693	0.461743	0.0327669	0.651844	0.0411121	0.677497	0.10228	0.70007	0.0465741	0.788089	0.0580019	0.129675	0.169901	0.114983	0.0191207	0.743694	0.110257	0.590761	0.0415805	0.34801
962.19	11.942	Camphene	Mh3	RI, MS	-	-	-	-	-	-	-	-	-	-	-	-	-	-	-	-	-	-	-	-	-	-	-	-	-	-	-	-	-	-	-	-	-	-	-	-	-	-	-	-	-	-	0.0430423	0.00441819	4.4809
979	13.197	Sabinene	Mh4	RI, MS	-	-	-	-	-	-	-	-	-	-	-	-	11.1478	1.07879	6.07465	0.169127	6.11305	0.509617	-	-	-	-	-	-	-	-	-	-	-	-	-	-	-	-	-	-	-	-	-	-	-	-	-	-	-
991.358	13.262	β-pinene	Mh5	RI, ST, MS	9.19671	0.792061	7.83074	0.936279	6.59203	0.0469403	2.91868	0.0427181	3.91009	0.0162672	6.50737	0.560848	-	-	-	-	-	-	11.877	0.615551	7.98408	0.231507	3.52689	0.291989	2.06658	0.0361059	0.812779	0.0534691	1.11103	0.0314006	0.543675	0.0692103	0.679632	0.0356182	0.601606	0.0161512	3.38449	0.180021	1.67447	0.443749	2.42243	0.363359	7.49493	0.428973	-
999.253	14.192	β-myrcene	Mh6	RI, ST, MS	1.45703	0.153736	1.38399	0.158546	1.10774	0.0401331	-	-	2.55319	0.143902	1.53196	0.084779	2.53063	0.247688	1.82057	0.0286239	1.48383	0.0254459	2.45558	0.190079	1.72919	0.150833	1.61858	0.204239	2.00936	0.0270989	2.02242	0.0870914	2.42121	0.0549641	1.40395	0.0869266	1.50089	0.0674318	1.53462	0.0758365	8.08015	0.241863	4.15467	0.283955	1.55188	0.183195	0.975232	0.0525172	0.886197
1018.22	15.464	α-terpinene	Mh7	RI, ST, MS	0.234592	0.00520226	0.184458	0.0167933	0.147931	0.000501995	0.436036	0.0277371	0.374076	0.0028132	0.116021	0.0036251	0.341831	0.0154021	-	-	0.106068	0.00582943	1.61731	2.21243	-	-	0.279421	0.0360351	-	-	-	-	-	-	0.109312	0.00629161	0.121831	0.00390273	0.125518	0.000922189	0.0832253	0.00157746	0.0473731	0.00264328	0.271806	0.0715233	-	-	-
1025.4	15.931	p-cymene	Mh8	RI, ST, MS	0.55558	0.0629682	0.380585	0.0274669	0.353676	0.0551049	8.56187	0.455023	6.52588	0.550532	-	-	-	-	-	-	-	-	-	-	-	-	0.784707	0.0951301	-	-	-	-	-	-	-	-	-	-	-	-	-	-	-	-	1.01133	0.0634525	-	-	-
1029.08	16.17	Limonene	Mh9	RI, ST, MS	1.47639	0.103076	1.14976	0.120778	1.07066	0.0585626	-	-	-	-	1.69343	0.130015	3.24865	0.250792	1.75041	0.107938	1.54238	0.0894754	4.6449	0.304648	2.69146	0.0793316	2.40657	0.459875	51.9877	0.285858	44.9509	1.32765	52.5299	1.22966	29.3014	2.02512	27.2451	0.989397	36.1717	1.9356	3.32176	0.102385	2.19312	0.407207	3.68356	0.41554	4.91845	0.202769	2.54014
1040.12	16.888	(Z)-ocimene	Mh10	RI, ST, MS	0.0632042	0.00110131	-	-	-	-							-	-	-	-	-	-	0.110035	0.00870944	-	-	1.71294	0.408119	0.464884	0.0243306	0.381298	0.0113161	-	-	1.00992	0.0587958	1.10099	0.0676682	1.24656	0.0601171	0.217594	0.0119071	0.141208	0.0117488	-	-	0.291961	0.00426177	0.1674
1044.08	17.125	(E)-ocimene	Mh11	RI, ST, MS	3.03487	0.22431	2.28608	0.137252	2.16217	0.280603	6.37089	0.258998	6.31683	0.886318	2.27423	0.0797301	1.62409	0.140242	1.17729	0.109548	1.39001	0.0574565	2.95456	0.44262	1.5362	0.0774683	8.39802	0.808613	6.14331	0.0855716	5.34704	0.0999552	6.34976	0.160745	2.73522	0.162763	2.56446	0.213685	2.95913	0.143281	6.41254	0.207442	3.22858	0.0756517	1.97352	0.196838	9.13852	0.184467	5.45243
1060.45	18.209	γ-terpinene	Mh13	RI, ST, MS	1.89585	0.151502	1.43803	0.095347	1.62769	0.101203	13.789	0.814379	8.91289	2.71615	0.183017	0.00839579	0.525381	0.0354381	0.300851	0.0370108	0.159764	0.0121602	0.534352	0.0263129	0.323897	0.0249838	0.122076	0.0208827	2.59692	0.0159573	1.96621	0.0468116	3.16562	0.08785	3.67821	0.165332	3.71182	0.274822	4.28804	0.275402	0.10998	0.00378446	0.0546752	0.00736046	11.0595	1.78291	0.0868218	0.00435151	0.0468215
1083.94	19.736	β-cymene *	Mh14	RI, ST, MS	-	-	-	-	-	-	-	-	-	-	-	-	-	-	-	-	-	-	-	-	-	-	-	-	-	-	-	-	-	-	-	-	-	-	-	-	-	-	-	-	-	-	-	-	-
1090.29	20.149	Terpinolene	Mh15	RI, ST, MS	-	-	-	-	-	-	-	-	-	-	-	-	0.312487	0.0161954	0.202652	0.0199943	0.155407	0.0041457	0.396009	0.0376246	0.255609	0.0183765	0.507602	0.0334401	0.394463	0.00886732	0.311301	0.00368891	-	-	0.275503	0.00381519	0.269001	0.0152197	0.311739	0.0246251	-	-	-	-	-	-	-	-	-
1127.77	23.215	1,3,8-p-menthatriene *	Mh16	RI, MS	-	-	-	-	-	-	-	-	-	-	-	-	-	-	-	-	-	-	-	-	-	-	-	-	0.0322619	0.00469274	0.030564	0.00132181	0.0314428	0.00248368	-	-	-	-	-	-	-	-	-	-	-	-	0.0374312	0.000589528	-
1131.17	23.514	2,4,6-octatriene,3,4-dimethyl *	Mh17	RI, MS	0.249468	0.00910435	0.184879	0.00826631	0.179976	0.00901202	0.24446	0.0365474	0.345246	0.21827	0.0652439	0.000651299	0.245925	0.0281092	0.141151	0.0151793	0.0700177	0.00226366	0.235427	0.00924659	0.163844	0.0178322	0.0968652	0.0163118	0.0335044	0.00315573	0.594833	0.00743312	0.671122	0.0316331	1.16234	0.0845955	1.04968	0.0796511	1.34855	0.0465537	0.772289	0.0231879	0.403063	0.0287192	0.0899897	0.00685324	0.695472	0.0142724	0.589795
		Oxygenated Monoterpenes
1030.75	16.279	1,8-cineol	Om1	RI, MS	-	-	-	-	-	-	6.04778	0.329652	3.15155	0.0799243	-	-	-	-	-	-	-	-	-	-	-	-	-	-	-	-	-	-	-	-	-	-	-	-	-	-	-	-	-	-	-	-	-	-	-
1067.55	18.671	cis-β-terpineol *	Om2	RI, MS	1.98719	0.0921476	1.64544	0.0570826	1.07579	0.0213097	0.579727	0.0311354	0.524747	0.0206122	0.718231	0.0598813	3.6033	0.187852	1.81398	0.0172875	0.855514	0.0454404	2.93001	0.135577	1.76945	0.102713	-	-	0.105958	0.00306193	0.0688052	0.00387867	0.0489398	0.00607024	0.118179	0.010064	0.131995	0.00808634	0.102784	0.0122258	0.0509362	0.00168735	0.0578539	0.00547381	0.102934	0.00902836	0.0486459	0.00496271	0.0484622
1075.74	19.203	cis-linaloloxide *	Om3	RI, MS	-	-	-	-	-	-	-	-	-	-	-	-	-	-	0.0638472	0.00641679	-	-	-	-	-	-	0.105019	0.0290613	-	-	-	-	-	-	-	-	-	-	-	-	0.169233	0.00912383	0.154609	0.0084525	0.0880163	0.0248488	0.131544	0.00277844	0.101991
1107.81	21.465	Linalool	Om4	RI, ST, MS	46.7618	1.31254	50.4261	1.15269	47.743	2.3592	22.6702	1.40483	17.4096	2.46702	42.7613	2.09215	44.7447	1.25667	42.9086	1.78973	46.9808	2.04455	29.1503	0.662184	36.1069	2.48129	24.9546	0.388374	7.95347	0.24371	6.87941	0.442589	3.93728	0.471033	1.45293	0.105926	1.71748	0.186775	1.58667	0.14171	54.4069	1.07213	56.1551	1.32519	21.5886	1.87953	36.4404	1.68102	53.5546
1136.62	23.992	Limonene oxide, cis	Om5	RI, ST, MS	-	-	-	-	-	-	-	-	-	-	-	-	-	-	-	-	-	-	-	-	-	-	-	-	-	-	-	-	-	-	-	-	-	-	-	-	-	-	0.0213329	0.00149254	1.14602	0.966381	-	-	-
1138.54	24.16	Limonene oxide, trans	Om6	RI, ST, MS	-	-	-	-	-	-	-	-	-	-	-	-	-	-	-	-	-	-	-	-	-	-	-	-	2.58172	0.168944	-	-	3.0419	0.450388	1.63151	0.0929686	2.19048	0.111445	2.78279	0.126306	-	-	-	-	-	-	-	-	-
1155.28	25.628	Citronellal	Om7	RI, ST, MS	0.13084	0.00304193	0.198315	0.00309481	0.259177	0.0246786	-	-	-	-	0.190309	0.00279577	0.432745	0.0160351	0.286623	0.0188287	0.194654	0.0182597	0.567215	0.0288891	0.41075	0.0237127	0.300709	0.134914	1.05332	0.0291498	0.987923	0.0709169	0.649505	0.0667908	0.230867	0.0172484	0.247961	0.0153498	0.223213	0.0141558	0.124761	0.00328826	0.104593	0.00661815	0.229815	0.0171659	0.0790138	0.000702761	0.05335
1175.67	27.416	Umbellulone *	Om8	RI, MS	-	-	0.0567405	0.00275993	-	-	-	-	-	-	-	-	-	-	-	-	-	-	-	-	-	-	-	-	-	-	-	-	-	-	-	-	-	-	-	-	-	-	-	-	-	-	-	-	-
1176.66	27.503	Terpinen-4-ol	Om9	RI, ST, MS	0.538641	0.0288746	0.469576	0.0256184	0.369664	0.0450804	0.941026	0.0679881	0.904173	0.0296579	0.242841	0.00978586	0.717542	0.045078	0.512005	0.0212148	0.275801	0.0103385	0.739312	0.123441	0.567244	0.0518085	0.355482	0.0143616	0.141155	0.000791084	-	-	0.688861	0.0516374	0.0516964	0.00235578	0.0729964	0.00838343	0.0702109	0.00146445	0.120206	0.00119479	0.119739	0.0110229	0.278259	0.0108103	0.118203	0.00199726	0.437553
1189.37	28.618	p-cymen-8-ol *	Om10	RI, MS	0.295295	0.0108376	0.173286	0.00697638	0.0851166	0.00666628	0.197374	0.0138219	0.225664	0.0137181	-	-	-	-	-	-	-	-	-	-	-	-	-	-	-	-	-	-	-	-	-	-	-	-	-	-	-	-	-	-	-	-	-	-	-
1192.41	28.884	α-Terpineol	Om11	RI, ST, MS	3.83474	0.0884783	2.94371	0.105315	1.95647	0.0858725	5.449	0.275861	5.58377	0.243194	1.00613	0.0580563	4.58555	0.199408	2.59722	0.085727	1.11974	0.0474743	4.37412	0.162989	2.8318	0.270783	0.644619	0.0900194	1.53736	0.0430569	-	-	-	-	2.38789	0.0443873	2.72316	0.128213	1.96824	0.112745	-	-	0.420997	0.0796748	-	-	0.420691	0.00161084	0.189303
1205.13	30.085	trans-dihydrocarvone *	Om12	RI, MS	-	-	-	-	-	-	-	-	-	-	-	-	-	-	-	-	-	-	-	-	-	-	-	-	0.150721	0.00908334	0.164895	0.0169086	0.138324	0.0244325	-	-	-	-	-	-	-	-	-	-	-	-	-	-	-
1208.45	30.118	Carvone *	Om13	RI, ST, MS	-	-	-	-	-	-	-	-	-	-	-	-	-	-	-	-	-	-	-	-	-	-	-	-	-	-	-	-	-	-	0.075713	0.00294091	0.0762591	0.0076631	0.084016	0.00918966	-	-	-	-	-	-	-	-	-
1209.72	30.563	trans-piperitol *	Om14	RI, MS	-	-	-	-	-	-	-	-	-	-	-	-	-	-	-	-	-	-	-	-	-	-	-	-	-	-	-	-	-	-	-	-	-	-	-	-	-	-	-	-	-	-	-	-	-
1215.31	31.145	p-menth-1-en-9-al *	Om15	RI, MS	0.0859496	0.00987215	0.0796856	0.00904782	0.103005	0.0107062	0.131076	0.0132576	-	-	-	-	-	-	-	-	-	-	-	-	-	-	-	-	-	-	0.507403	0.0314634	0.33119	0.0473982	-	-	-	-	-	-	-	-	-	-	-	-	0.560908	0.0322227	0.56569
1219.48	31.58	cis-carveol	Om16	RI, MS	-	-	-	-	-	-	1.00474	0.0861081	0.784085	0.134921	0.428398	0.0332829	-	-	-	-	-	-	0.0294211	0.00319929	-	-	-	-	0.242243	0.0116558	0.303153	0.0301359	0.295564	0.0516882	0.864964	0.138521	0.952445	0.132655	1.15484	0.210908	0.0568972	0.00137673	0.0572791	0.00541807	-	-	0.0462137	0.00123077	0.0331468
1230.38	32.716	cis-geraniol	Om17	RI, ST, MS	-	-	-	-	-	-	-	-	-	-	0.155655	0.00360607	0.21934	0.0112168	0.337752	0.108913	0.149312	0.0037387	0.296173	0.0120742	0.411289	0.0356388	0.695165	0.0884478	0.213357	0.00554969	0.0254958	0.0032529	0.175938	0.0215506	0.466048	0.0271224	-	-	-	-	1.18728	0.213556	2.14899	0.12588	0.466042	0.0599541	1.37315	0.0296108	2.84169
1232.57	32.944	β-citronellol	Om18	RI, ST, MS	0.06405	0.00295501	0.567492	0.0273532	0.572261	0.038576	-	-	-	-	0.0992936	0.00280502	0.110566	0.00560929	0.145931	0.00638837	0.090284	0.00508419	0.269003	0.0148747	0.367414	0.0317937	0.603226	0.0438219	0.0503343	0.000231337	0.0676383	0.00143357	0	0	-	-	-	-	-	-	-	-	-	-	0.611882	0.0316232	-	-	-
1236.49	33.352	Methyl thymyl ether	Om19	RI, MS	1.93011	0.0827872	1.19425	0.0646457	1.07201	0.0267928	-	-	-	-	-	-	-	-	-	-	-	-	0.556187	0.0132966	5.7352	0.521159	0.086763	0.0106618	0.0648138	0.00178905	0.0616614	0.00241794	0.0555751	0.00120799	-	-	-	-	-	-	-	-	-	-	-	-	-	-	-
1237.48	33.455	Isogeraniol *	Om20	RI, MS	-	-	-	-	-	-	-	-	-	-	-	-	-	-	-	-	-	-	-	-	-	-	-	-	-	-	-	-	-	-	-	-	-	-	-	-	-	-	-	-	-	-	-	-	0.0721774
1242.38	33.966	β-citral	Om21	RI, ST, MS	0.039305	0.00165289	0.0946298	0.00595646	0.14903	0.00861786	-	-	-	-	0.289103	0.0121855	0.481503	0.0268125	0.326714	0.00187053	0.284894	0.0127257	0.426217	0.0188872	0.263336	0.0177955	2.55117	0.43706	0.922638	0.0283442	0.652849	0.048332	0.51558	0.0739452	17.7533	0.981183	17.1002	0.356282	13.2708	0.605286	1.51708	0.0275459	2.28099	0.096488	1.63756	0.0909014	0.933096	0.0199923	1.02783
1258.08	35.602	trans-geraniol	Om22	RI, ST, MS	0.165269	0.00824089	1.12428	0.0482045	2.46576	0.119592	0.216797	0.022462	-	-	-	-	0.084541	0.018299	-	-	-	-	0.0937522	0.00413721	0.135067	0.0102281	6.79571	0.519816	-	-	-	-	-	-	0.330706	0.0257373	0.438468	0.0254744	0.30956	0.0381359	0.633521	0.0232857	1.82372	0.103675	6.52059	0.518554	0.787491	0.0293251	1.20381
1273.11	37.168	α-citral	Om23	RI, ST, MS	0.118972	0.0088778	0.0358789	0.0018648	0.0730968	0.00497281	-	-	-	-	0.430268	0.0159573	0.67619	0.0396547	0.660971	0.0160935	0.778371	0.0423326	0.592708	0.033801	11.1707	0.881352	3.30091	0.543474	1.23675	0.0433585	0.910917	0.075621	0.499114	0.437951	25.8074	1.20647	24.4963	1.60307	20.0745	1.3984	1.83435	0.0389052	3.06751	0.120967	2.39626	0.126704	0.918148	0.0271963	1.18693
1281.94	38.004	α-thujenal	Om24	RI, MS	-	-	-	-	-	-	0.191802	0.0345689	1.33405	0.266327	0.673304	0.0847023	-	-	-	-	-	-	-	-	-	-	-	-	-	-	-	-	-	-	-	-	-	-	-	-	-	-	-	-	-	-	-	-	-
1298.66	39.82	Carvacrol *	Om25	RI, ST, MS	-	-	-	-	-	-	-	-	-	-	-	-	-	-	-	-	-	-	-	-	-	-	-	-	-	-	-	-	0.869575	0.0387908	-	-	-	-	-	-	-	-	-	-	-	-	-	-	-
1733.01	77.395	E,E-farnesal *	Om26	RI, ST, MS	-	-	-	-	-	-	-	-	-	-	0.194278	0.00604605	-	-	-	-	-	-	-	-	-	-	-	-	0.0270134	0.00376086	-	-	0.0987865	0.00852047	0.0446022	0.00518951	0.0966525	0.0052802	0.0572679	0.00653493	-	-	-	-	0.410838	0.711592	0.157006	0.0169761	0.170462
		Sesquiterpene hydrocarbons
1335.47	43.935	δ-elemene	Sh1	RI, MS	1.35716	0.0314155	0.897539	0.0231183	1.36071	0.199203	-	-	-	-	-	-	-	-	-	-	-	-	-	-	-	-	0.802793	0.17644	0.220743	0.0144648	-	-	-	-	-	-	-	-	-	-	1.01612	0.106922	0.687199	0.110642	1.23277	0.111275	0.938369	0.115306	0.646155
1336	43.995	α-cubebene *	Sh2	RI, MS	0.0483668	0.00106219	0.0257705	0.00137184	0.0329489	0.0053083	-	-	-	-	-	-	-	-	-	-	-	-	-	-	-	-	-	-	0.240213	0.010752	0.0507088	0.00967953	0.0452613	0.00808447	-	-	-	-	-	-	-	-	-	-	-	-	-	-	-
1370.66	47.87	Copaene *	Sh3	RI, MS	-	-	-	-	-	-	-	-	-	-	-	-	-	-	-	-	-	-	-	-	-	-	-	-	-	-	0.224796	0.0213068	0.188699	0.0228732	-	-	-	-	-	-	-	-	-	-	-	-	-	-	-
1392.25	50.283	β-elemene	Sh4	RI, MS	0.389794	0.00321549	-	-	0.0232609	0.00279954	5.39806	0.231944	4.75755	2.76217	2.12873	0.245155	1.9338	0.111355	0.120861	0.00668675	1.46837	0.0533834	19.4297	0.279538	3.09307	0.257259	5.73369	0.328934	-	-	7.52828	0.316872	6.01816	0.328305	-	-	-	-	-	-	-	-	0.144272	0.120083	4.98424	0.0996246	0.261865	0.0163935	0.189219
1398.23	50.952	Zingiberene *	Sh5	RI, MS	-	-	-	-	0.129219	0.0179114	-	-	-	-	-	-	-	-	-	-	-	-	-	-	-	-	-	-	-	-	-	-	-	-	-	-	-	-	-	-	-	-	-	-	0.172686	0.0074049	-	-	-
1406.86	51.925	Bergamotene *	Sh6	RI, MS	-	-	-	-	-	-	-	-	-	-	-	-	-	-	-	-	-	-	0.100291	0.0120947	0.0938914	0.00753215	0.310178	0.345939	0.0515914	0.00389213	-	-	-	-	-	-	-	-	-	-	-	-	-	-	-	-	0.831185	0.0656718	-
1407.73	52.023	trans-α-bergamotene	Sh7	RI, MS	0.125071	0.00465406	0.0761278	0.00152017	-	-	-	-	-	-	0.101505	0.016388	0.0880231	0.0174936	0.0994223	0.0162921	0.0720127	0.00503309	-	-	-	-	-	-	-	-	0.0680159	0.00628653	0.0486129	0.00904838	-	-	-	-	-	-	-	-	-	-	-	-	-	-	-
1412.39	52.55	Caryophyllene	Sh8	RI, ST, MS	0.480522	0.0184728	0.330364	0.00803591	0.417083	0.114228	2.11493	0.137654	2.60631	0.118419	-	-	0.651819	0.114412	0.555947	0.0739545	0.430852	0.0327782	1.01992	0.122664	0.934106	0.0261389	1.33847	0.20552	3.50293	0.236386	3.93122	0.58534	3.13974	0.504439	1.83392	0.137251	1.98547	0.123414	1.79272	0.162023	1.13495	0.149676	0.695284	0.0875544	2.18462	0.0278505	0.0718285	0.00578691	-
1417.25	53.099	α-santalene *	Sh9	RI, MS	-	-	-	-	-	-	-	-	-	-	-	-	-	-	-	-	-	-	-	-	-	-	-	-	-	-	0.0650273	0.00946738	0.0153618	0.00374936	0.0675662	0.00533213	0.0694516	0.00611001	0.0491571	0.00491055	-	-	-	-	-	-	-	-	-
1422.44	53.686	β-cubebene	Sh10	RI, MS	0.0579705	0.000829485	0.0365871	0.0021894	0.0572341	0.00783939	-	-	0.120284	0.0108539	0.513215	0.0966285	-	-	-	-	-	-	-	-	-	-	0.560266	0.670157	0.074312	0.0423007	-	-	0.0589772	0.0088945	0.0288605	0.000862436	0.0388126	0.00815595	0.038712	0.00576331	0.0758665	0.0104416	0.0558636	0.00712182	0.253118	0.018527	-	-	1.64138
1430.9	54.642	γ-elemene	Sh11	RI, MS	1.161	0.0297361	0.819246	0.0209676	1.06251	0.150169	0.575167	0.0315606	0.745076	0.0769257	0.173286	0.0303116	-	-	-	-	-	-	-	-	-	-	1.37336	0.148783	0.0503769	0.00616108	0.0567379	0.00636473	0.0474489	0.00567923	-	-	-	-	-	-	0.371694	0.0409566	0.289652	0.0232866	1.76608	0.153138	-	-	0.0484114
1434.61	55.061	α-bergamotene	Sh12	RI, MS	-	-	-	-	-	-	-	-	-	-	3.99631	0.479482	-	-	-	-	-	-	-	-	-	-	-	-	-	-	2.21785	0.384512	1.78313	0.312235	0.648614	0.0577894	0.655007	0.131334	0.585242	0.0789565	-	-	-	-	0.0312593	0.00178559	-	-	-
1445	56.235	α-caryophyllene	Sh13	RI, MS	-	-	-	-	-	-	-	-	-	-	-	-	0.175946	0.0315316	-	-	-	-	-	-	-	-	-	-	-	-	0.953443	0.124459	0.789383	0.0331036	-	-	-	-	-	-	-	-	-	-	-	-	-	-	-
1455.82	57.458	Epi-bicyclosesquiphellandrene *	Sh14	RI, MS	0.190748	0.00124815	0.122804	0.00556064	0.21013	0.0265401	-	-	-	-	-	-	0.114755	0.0200738	0.118877	0.00564322	-	-	0.110913	0.0414299	0.121279	0.00185348	0.478028	0.364993	-	-	-	-	-	-	0.0348223	0.00541099	0.045524	0.00913828	0.0435147	0.00688861	-	-	0.0213282	0.000613581	-	-	0.143793	0.0120768	0.103112
1461.26	58.072	β-farnesene	Sh15	RI, MS	3.5302	0.0667991	2.23924	0.106607	3.04146	1.03913	-	-	-	-	-	-	3.88972	0.0545026	3.5562	0.624345	2.69441	0.046888	2.0307	0.708246	2.24958	0.0997671	3.4335	0.219676	1.88252	0.12012	2.26035	0.311492	1.64302	0.243785	0.0977762	0.0135802	0.125211	0.00721879	0.114707	0.0095929	0.0805245	0.00688343	0.0987263	0.0147131	5.16399	0.382674	0.062331	0.0549498	-
1463.81	58.36	α-gurjunene *	Sh16	RI, MS	-	-	-	-	-	-	-	-	-	-	-	-	-	-	-	-	-	-	-	-	-	-	-	-	-	-	-	-	-	-	-	-	-	-	-	-	-	-	-	-	-	-	-	-	-
1470.01	59.061	α-elemene *	Sh17	RI, MS	-	-	-	-	-	-	-	-	-	-	-	-	-	-	-	-	-	-	-	-	-	-	-	-	-	-	0.0202885	0.00338424	0.0142503	0.00158879	-	-	-	-	-	-	-	-	-	-	0.178429	0.240371	-	-	-
1473.91	59.502	Germacrene D	Sh18	RI, MS	0.280708	0.00324302	0.184528	0.00501624	0.0282455	0.006278	0.224131	0.0180888	0.485147	0.348308	0.0421647	0.0119817	-	-	-	-	-	-	-	-	-	-	1.36054	0.311865	0.358852	0.0298198	0.454888	0.0593044	0.454099	0.0247806	0.157758	0.0135106	0.316905	0.0651852	0.31845	0.0401096	0.365512	0.27574	0.399787	0.0638589	1.17092	0.883184	-	-	0.0992265
1475.35	59.665	β-eudesmene *	Sh19	RI, MS	-	-	-	-	-	-	-	-	-	-	-	-	-	-	-	-	-	-	-	-	0.0738662	0.00824256	-	-	0.119964	0.0163999	0.113893	0.00847825	0.0963293	0.00303436	-	-	-	-	-	-	-	-	-	-	-	-	-	-	-
1477.71	59.931	α-selinene *	Sh20	RI, MS	-	-	-	-	-	-	0.0808174	0.00875223	0.228219	0.0162228	-	-	-	-	-	-	-	-	-	-	-	-	0.0999616	0.0172667	-	-	-	-	0.10062	0.00596739	-	-	-	-	-	-	-	-	-	-	0.150088	0.016078	-	-	-
1480.79	60.279	Allo-aromadendrene	Sh21	RI, MS	-	-	-	-	-	-	-	-	-	-	-	-	-	-	0.0627027	0.00895736	-	-	-	-	-	-	-	-	0.169632	0.0641959	0.18929	0.0304113	0.137385	0.0138534	-	-	-	-	-	-	-	-	-	-	-	-	-	-	-
1489.11	61.219	Bicyclogermacrene	Sh22	RI, MS	-	-	-	-	-	-	0.112001	0.0079602	0.130977	0.00534066	0.0160666	0.0139498	-	-	-	-	-	-	0.0247376	-	-	-	-	-	-	-	-	-	-	-	-	-	-	-	-	-	0.0434739	0.00380985	0.391677	0.0373253	-	-	0.449115	0.0374904	0.348611
1491.17	61.252	α-muurolene *	Sh23	RI, MS	-	-	0.425184	0.00510434	0.245987	0.0755755	-	-	-	-	-	-	-	-	-	-	-	-	-	-	-	-	-	-	-	-	-	-	-	-	-	-	-	-	-	-	-	-	-	-	0.551511	0.0517888	-	-	-
1496.23	62.024	α-bulnesene *	Sh24	RI, MS	0.0316173	0.000258429	-	-	0.408386	0.0720976	-	-	-	-	-	-	-	-	0.0650352	0.0127667	-	-	-	-	-	-	-	-	0.175096	0.0130735	0.209253	0.0252724	0.163063	0.0236926	-	-	-	-	-	-	-	-	-	-	0.051416	0.00507455	-	-	-
1499.31	62.372	(Z,E)-α-farnesene	Sh25	RI, MS	-	-	-	-	-	-	-	-	-	-	-	-	-	-	-	-	-	-	-	-	-	-	-	-	0.0962222	0.00917905	0.111247	0.00767831	-	-	-	-	-	-	-	-	-	-	0.0443007	0.00230257	-	-	0.417441	0.103966	0.29111
1502.39	63.024	γ-muurolene	Sh26	RI, MS	-	-	-	-	-	-	-	-	-	-	-	-	-	-	-	-	-	-	-	-	-	-	-	-	-	-	-	-	-	-	-	-	-	-	-	-	-	-	-	-	0.0599005	0.00537631	0.045754	0.00827386	-
1502.66	63.328	α-farnesene *	Sh27	RI, ST, MS	-	-	-	-	0.107714	0.0120476	-	-	-	-	-	-	-	-	-	-	-	-	-	-	-	-	0.0910936	0.0156482	0.135106	0.01629	0.153061	0.0187559	0.116613	0.0152198	-	-	-	-	-	-	-	-	-	-	-	-	-	-	-
1504.02	63.415	β-bisabolene	Sh28	RI, MS	-	-	-	-	-	-	-	-	-	-	-	-	-	-	-	-	-	-	-	-	-	-	-	-	2.42028	0.147576	2.82445	0.289591	2.33794	0.308105	1.53883	0.160633	1.63332	0.349051	1.47157	0.237173	-	-	-	-	-	-	-	-	-
1505.77	63.834	δ-cadinene	Sh29	RI, MS	2.16629	0.0873938	1.29828	0.0773774	1.67464	0.518904	-	-	-	-	-	-	0.98964	0.1562	1.07072	0.128913	0.709916	0.0257243	0.404342	0.299941	0.781624	0.0569356	-	-	-	-	-	-	-	-	-	-	-	-	-	-	0.818364	0.0791941	0.250511	0.0276861	-	-	1.12782	0.137064	0.302228
1507.2	64.877	β-sesquiphellandrene	Sh30	RI, MS	0.346455	0.0164507	-	-	0.302081	0.101646	4.31201	0.311805	6.40999	1.29199	-	-	0.198023	0.0299792	0.252231	0.0303236	0.157801	0.0093775	0.39585	0.386429	0.238216	0.017577	-	-	0.0776508	0.00867585	0.0943848	0.00987471	0.0661634	0.00999599	-	-	-	-	-	-	-	-	-	-	0.336135	0.0372313	-	-	-
1510.3	64.921	Eudesma-3,7(11)-diene *	Sh31	RI, MS	-	-	-	-	-	-	-	-	-	-	-	-	-	-	-	-	-	-	-	-	-	-	0.180509	0.109009	-	-	-	-	-	-	-	-	-	-	-	-	-	-	-	-	-	-	-	-	-
1519.7	67.176	cis-α-bisabolene *	Sh32	RI, MS	-	-	-	-	-	-	-	-	-	-	-	-	-	-	-	-	-	-	-	-	-	-	-	-	0.0533944	0.0108126	-	-	0.0468897	0.00174652	0.13944	0.0168527	0.137132	0.015797	0.138616	0.0134677	-	-	-	-	0.0739566	0.0107682	-	-	-
		Oxygenated Sesquiterpenes
1530.22	69.699	Nerolidol	Os1	RI, MS	0.131521	0.0121341	0.239525	0.0201148	0.0601065	0.00590614	-	-	-	-	0.253873	0.0266507	0.293131	0.0153746	3.03976	0.137766	3.6431	0.256891	0.261607	0.0134683	1.74133	0.234769	-	-	-	-	0.151271	0.00816016	0.0619898	0.0042522	0.270016	0.00571282	1.44203	0.0651697	0.513551	0.0547501	3.56875	0.335778	4.03517	0.300942	0.921497	0.0972806	6.93535	0.960475	7.47424
1532.31	69.721	Caryophyllene oxide	Os2	RI, MS	-	-	-	-	-	-	-	-	-	-	0.349567	0.563176	-	-	-	-	-	-	-	-	-	-	-	-	-	-	-	-	-	-	0.0813076	0.00170788	0.126805	0.00622071	0.0550663	0.00224617	-	-	-	-	-	-	-	-	-
1657.62	75.428	β-eudesmol *	Os3	RI, MS	0.0374427	0.00185274	0.0302301	0.00464238	-	-	-	-	-	-	-	-	-	-	-	-	-	-	-	-	-	-	-	-	-	-	-	-	-	-	-	-	-	-	-	-	-	-	-	-	-	-	-	-	-
1695.99	76.51	Tetradecanal *	Os4	RI, MS	-	-	-	-	-	-	-	-	-	-	-	-	-	-	-	-	-	-	-	-	-	-	0.931389	0.0212737	-	-	-	-	-	-	-	-	-	-	-	-	-	-	-	-	-	-	-	-	-
1734.12	77.412	Farnesol	Os5	RI, ST, MS	-	-	0.229334	0.295888	0.290962	0.373177	0.367513	0.0503751	1.07319	0.0882266	0.863279	0.025182	0.952928	1.20103	1.54425	0.103121	0.783047	0.0732987	1.41173	0.111504	1.10812	0.13037	-	-	0.144906	0.00788771	0.687034	0.0386694	0.28202	0.0220644	0.130011	0.0068517	0.657351	0.0374076	0.358639	0.0223961	1.31867	0.0320017	1.7325	0.0680715	0.844623	0.74951	2.37528	0.089149	2.28174
1764.97	77.884	α-sinensal	Os6	RI, MS	0.960253	0.417676	0.180266	0.156176	0.303997	0.0797576	-	-	-	-	-	-	-	-	-	-	-	-	0.115754	0.00192477	0.443579	0.0377207	-	-	-	-	-	-	-	-	-	-	-	-	-	-	-	-	-	-	-	-	-	-	-
		Ketones																									-	-							-	-	-	-	-	-							-	-	-
1124.73	22.25	Chrysanthenone *	K1	RI, MS	-	-	-	-	-	-	0.105427	0.00310624	0.392132	0.0354439	-	-	0.19379	0.0359068	-	-	-	-	-	-	-	-	-	-	-	-	-	-	-	-	-	-	-	-	-	-	-	-	-	-	-	-	-	-	-
1394.79	50.603	cis-jasmone	K2	RI, MS	0.272064	0.0177349	0.902244	0.0526071	1.00088	0.0884591	0.975477	0.0620149	1.43512	0.0484059	0.566473	0.0263718	0.361656	0.0234097	0.861217	0.0372841	0.564451	0.0151465	0.24474	0.00859818	0.71803	0.0564425	0.291547	0.0390723	0.0487829	0.00341829	0.139582	0.01071	0.102769	0.0116308	-	-	-	-	-	-	-	-	-	-	0.2157	0.0244481	-	-	-
		Esters																																	-	-	-	-	-	-
1306.14	40.657	Methyl geranate	E1	RI, MS	-	-	-	-	-	-	0.099821	0.00823731	-	-	0.938372	0.10934	1.7876	0.104608	8.2557	0.652938	15.8073	0.732408	-	-	-	-	-	-	0.255853	0.00135689	0.130396	0.0889814	-	-	-	-	-	-	-	-	0.104672	0.00583488	0.193163	0.014251	0.117588	0.149979	0.299119	0.0368854	0.19813
1347.23	45.25	Citronellyl l acetate *	E2	RI, MS	-	-	-	-	-	-	-	-	-	-	-	-	-	-	-	-	-	-	-	-	-	-	-	-	-	-	0.0335236	0.00142126	0.0317738	0.00145833	-	-	-	-	-	-	-	-	-	-	-	-	-	-	-
1370.22	47.821	Nerol acetate	E3	RI, MS	-	-	-	-	-	-	-	-	-	-	0.0648752	0.0053642	0.0496308	0.00709975	0.0707558	0.00906225	0.0538059	0.00280074	0.059323	0.010868	0.0678184	0.000900506	-	-	-	-	-	-	-	-	0.0290243	0.00318007	0.0342927	0.00189089	0.0198844	0.0148069	0.110503	0.011509	0.110366	0.0054622	0.129353	0.00294554	0.115075	0.00612551	0.167115
1389.8	50.01	Geranyl acetate	E4	RI, ST, MS	-	-	-	-	-	-	0.0599042	0.00609886	0.122313	0.0765153	-	-	-	-	-	-	-	-	-	-	-	-	-	-	-	-	-	-	-	-	0.0942613	0.00819017	0.117974	0.0055792	0.102588	0.011016	-	-	-	-	-	-	-	-	-
		Miscellanous															-	-	-	-	-	-																									-	-	-
1297.94	39.755	p-thymol	P1	RI, ST, MS	4.96333	0.261675	4.21413	0.340871	4.03406	0.981004	-	-	0.200648	0.027107	-	-	-	-	-	-	-	-	-	-	-	-	-	-	0.964531	0.0177888	1.05212	0.0993521	-	-	-	-	-	-	-	-	-	-	-	-	0.0702487	0.00819203	-	-	-
1665.33	75.694	Methyl jasmonate *	DFG	RI, MS	-	-	-	-	-	-	-	-	-	-	-	-	-	-	-	-	-	-	-	-	-	-	0.036821	0.00336702	-	-	-	-	-	-	-	-	-	-	-	-	0.0130283	0.00125179	0.0212203	0.00195472	-	-	-	-	-
1075.49	19.187	1-octanol	Ac1	RI, ST, MS	-	-	-	-	-	-	-	-	-	-	-	-	-	-	-	-	-	-	-	-	-	-	-	-	0.0674606	0.00329675	0.057489	0.00392779	0.0407963	0.000395682	0.0863669	0.0051853	-	-	0.0713446	0.0101011	-	-	-	-	-	-	-	-	-
1116.24	22.204	Phenylethyl alcohol	Ac2	RI, MS	0.044187	0.00248567	0.340155	0.0244952	0.968831	0.0538316	0.146997	0.036441	0.873948	0.135879	0.324047	0.0201176	-	-	0.129071	0.008447	0.350268	0.0152611	-	-	0.0583685	0.00603465	0.980279	0.308553	-	-	-	-	-	-	-	-	-	-	-	-	0.146171	0.00199595	0.108208	0.01555	0.74906	0.0525214	0.0926294	0.00299794	0.179354
896.788	9.376	Styrene *	Ah1	RI, MS	-	-	-	-	-	-	-	-	-	-	-	-	-	-	-	-	-	-	-	-	-	-	-	-	0.0390067	0.000911129	-	-	-	-	-	-	-	-	-	-	-	-	-	-	-	-	-	-	-
1091.38	20.22	α,p-dimethylstyrene	Ah2	RI, MS	0.823017	0.0402057	0.562496	0.00810284	0.514539	0.0545541	2.16679	0.0384003	1.33356	0.174204	-	-	-	-	-	-	-	-	-	-	-	-	-	-	-	-	-	-	-	-	-	-	-	-	-	-	0.171411	0.00790879	0.107264	0.0165377	0.584389	0.150383	-	-	-
1159.86	26.03	Naphthalene *	Ah3	RI, MS	-	-	-	-	-	-	-	-	-	-	-	-	-	-	-	-	-	-	-	-	-	-	-	-	-	-	-	-	0.106197	0.0167163	-	-	-	-	-	-	-	-	-	-	-	-	-	-	-
1139.6	24.253	Benzyl nitrile	N1	RI, MS	0.469992	0.00761641	2.14365	0.120531	4.61002	0.493287	1.98872	0.132736	3.42912	0.0811229	1.1952	0.0623739	1.01963	0.0446602	1.38301	0.0586548	1.25262	0.0251488	0.472118	0.0120348	0.833626	0.0801491	2.48772	0.424833	-	-	-	-	-	-	-	-	-	-	-	-	0.478033	0.0130568	0.248353	0.0129326	-	-	0.386802	0.0347486	0.591135
1292.25	39.162	Indole	N2	RI, MS	2.27737	0.143409	3.96007	2.8233	4.98544	0.870021	3.6893	0.270551	5.00391	0.301981	4.8955	0.324524	5.27316	0.266067	10.4119	0.767426	4.86354	0.190007	4.45006	0.0824054	6.90811	5.91629	8.43353	0.304452	0.632303	0.0162694	1.00923	0.0666706	0.731658	0.0216093	0.0834406	0.010693	0.164087	0.0107207	0.14488	0.00569809	4.78786	0.108321	5.51044	0.399349	8.83731	1.00903	8.15599	0.51108	7.17985
1340.76	44.527	Methyl anthranilate	N3	RI, MS	-	-	0.218978	0.0182498	0.343963	0.0915386	1.11706	0.0561649	4.87295	0.631484	17.9085	1.89764	-	-	-	-	-	-	-	-	-	-	1.76794	0.312696	0.279729	0.00960619	2.46675	0.152369	0.0414315	0.00451578	-	-	-	-	-	-	-	-	4.20299	0.206448	2.78685	0.369068	8.21338	0.546783	-
1534.63	70.758	Pentadecane, 3-methyl- *	Ak1	RI, MS	-	-	-	-	-	-	-	-	-	-	2.56299	2.22052	-	-	-	-	-	-	0.170174	0.0178085	0.039831	0.00417983	1.14225	0.0940669	-	-	0.0160004	0.00205445	0.0133622	0.000679834	-	-	-	-	-	-	-	-	-	-	-	-	-	-	-
1680.46	76.216	Hexadecane, 2-methyl- *	Ak2	RI, MS	-	-	-	-	-	-	-	-	-	-	0.0683418	0.00788425	0.14675	0.0751818	0.154193	0.021713	0.0965991	0.0118714	0.0436131	0.0100921	0.147984	0.011906	-	-	-	-	-	-	-	-	-	-	-	-	-	-	-	-	-	-	-	-	-	-	-
1688.81	76.504	8-heptadecene	Ak3	RI, MS	2.22847	0.0407403	2.61903	0.112361	1.7025	0.0294946	0.366241	0.0819556	0.266675	0.0388339	1.25764	0.0969196	1.53754	1.16478	2.42932	0.206257	1.74297	0.183534	0.332032	0.396269	2.76282	0.171931	0.0221112	0.0199919	0.404805	0.294031	1.65326	0.102623	0.523147	0.0660744	0.25025	0.0116747	0.44897	0.0639464	0.358399	0.0667567	-	-	-	-	1.02607	0.149072	-	-	-
1808.8	78.515	Octadecane, 2-methyl *	Ak4	RI, MS	0.0207325	0.00127765	0.017206	0.00173097	0.0101247	0.00167654	-	-	-	-	-	-	0.463609	0.00216022	0.214787	0.01797	0.0467294	0.00429876	0.256425	0.0249287	0.01505	0.00287048	0.0419108	0.00870924	-	-	-	-	-	-	-	-	-	-	-	-	-	-	0.391677	0.0373253	-	-	0.449115	0.0374904	0.348611
Data are arranged according to chemical groups represented in mean percentage (peak area percentage) of individual flower constituents from triplicate experiments;
a Retention indice analyzed on HP-5MS; bRetention time, cIdentification method; dFamily code. A: Aldehydes; Mh: Monoterpene hydrocarbons; Om: Oxygenated monoterpenes; Sh: Sesquiterpene hydrocarbons; Os: Oxygenated sesquiterpenes; K: Ketones; E: Esters; P: Phenol; DFG: Diverse functional group; Ac: Alcohol; Ah: Aromatic hydrocarbons; N: Nitrogen derivative; Ak: Alkane;
e Flower stages are represented as, U; Unopened flower; H; Half opened flower, F; Fully opened flower, f Standard deviation, g Undetected, and * Represents tentatively identified new compounds in flower volatiles
[truncated: 9 more columns]

## Sheet: Sheet2
						retention indces for flower volatiles								5.98967	Hexanal				5.98967	Hexanal		5.984	Hexanal			809.067	Hexanal			Hexanal	808.912
5.984	Hexanal	5.984	Hexanal	5.984	Hexanal	2.984	8.952	48.952	808.912	47.92	8			7.89033	2-Hexenal				7.89033	2-Hexenal		7.892	2-Hexenal*			858.29	2-Hexenal			2-Hexenal*	858.342
7.892	2-Hexenal*	7.892	2-Hexenal*	7.892	2-Hexenal*	4.892	14.676	54.676	858.342	47.92				9.947	Heptanal				8.60967	Styrene		9.376	Styrene*			911.46	Heptanal			Styrene*	896.788
9.376	Styrene*	9.376	Styrene*	9.376	Styrene*	6.376	19.128	59.128	896.788	47.92				10.333	2,4-Hexadienal, (E,E)-				9.947	Heptanal						921.138	2,4-Hexadienal, (E,E)*c			α-Thujene	938.506
11.012	α-Thujene	11.012	α-Thujene	11.012	α-Thujene	8.012	24.036	64.036	938.506	59.5	9			12.577	Benzaldehyde				10.333	2,4-Hexadienal, (E,E)-						978.438	Benzaldehyde*			α-Pinene	945.025
11.268	α-Pinene	11.268	α-Pinene	11.268	α-Pinene	8.268	24.804	64.804	945.025	59.5				18.035	Melonal				10.3723	α-Thujene		11.012	α-Thujene			1057.69	Melonal*			Camphene	962.19
11.942	Camphene	11.942	Camphene	11.942	Camphene	8.942	26.826	66.826	962.19	59.5				21.611	Nonanal				11.2803	α-Pinene		11.268	α-Pinene			1109.46	Nonanal			Benzaldehyde	977.267
12.534	Benzaldehyde	12.534	Benzaldehyde	12.534	Benzaldehyde	9.534	28.602	68.602	977.267	59.5				30.6103	Decanal				11.949	Camphene		11.942	Camphene			1210.17	Decanal			Sabinene	990.806
13.197	Sabinene	13.197	Sabinene	13.197	Sabinene	0.197	0.197	70.197	990.806	59.5				41.299	Undecanal				12.577	Benzaldehyde		12.534	Benzaldehyde			1311.9	Undecanal			β-Pinene	991.358
13.262	β-Pinene	13.262	β-Pinene	13.262	β-Pinene	0.262	0.262	70.262	991.358	59.5				50.8993	Safranal							13.197	Sabinene			922.156	α-Thujene			β-Myrcene	999.253
14.192	β-Myrcene	14.192	β-Myrcene	14.192	β-Myrcene	1.192	1.192	71.192	999.253	59.5				10.3723	α-Thujene				13.3747	β-Pinene		13.262	β-Pinene			945.331	α-Pinene			α-Terpinene	1018.22
15.464	α-Terpinene	15.464	α-Terpinene	15.464	α-Terpinene	2.464	2.464	72.464	1018.22	71.28	10			11.2803	α-Pinene				13.4123	β-Terpinene						962.394	Camphene			p-Cymene	1025.4
15.931	p-Cymene	15.931	p-Cymene	15.931	p-Cymene	2.931	2.931	72.931	1025.4	71.28				11.949	Camphene				13.806	Phenol						992.275	β-Pinene			Limonene	1029.08
16.17	Limonene	16.17	Limonene	16.17	Limonene	3.17	3.17	73.17	1029.08	71.28				13.3747	β-Pinene				14.199	β-Myrcene		14.192	β-Myrcene			992.615	β-Terpinene			1,8-Cineol	1030.75
16.279	1,8-Cineol	16.279	1,8-Cineol	16.279	1,8-Cineol	3.279	3.279	73.279	1030.75	71.28				13.4123	β-Terpinene				15.023	α-Phellandrene						997	β-Myrcene			β-trans-Ocimene	1040.12
16.888	β-trans-Ocimene	16.888	β-trans-Ocimene	16.888	β-trans-Ocimene	3.888	3.888	73.888	1040.12	71.28				14.199	β-Myrcene				15.1303	3-Carene						1011.38	α-Phellandrene			Benzeneacetaldehyde*	1043.63
17.116	Benzeneacetaldehyde*	17.116	Benzeneacetaldehyde*	17.116	Benzeneacetaldehyde*	4.116	4.116	74.116	1043.63	71.28				15.023	α-Phellandrene				15.5147	α-Terpinen		15.464	α-Terpinene			1013.08	3-Carene			β-cis-Ocimene	1050.08
17.535	β-cis-Ocimene	17.535	β-cis-Ocimene	17.535	β-cis-Ocimene	4.535	4.535	74.535	1050.08	71.28				15.1303	3-Carene				16.15	p-cymene		15.931	p-Cymene			1018.92	α-Terpinen			β-Ocimene	1053.57
17.562	β-Ocimene	17.762	β-Ocimene	17.762	β-Ocimene	4.762	4.762	74.762	1053.57	71.28				15.5147	α-Terpinen				16.17	D-Limonene		16.17	Limonene			1028.77	p-Cymene			γ-Terpinene	1060.45
18.209	γ-Terpinene	18.209	γ-Terpinene	18.209	γ-Terpinene	5.209	5.209	75.209	1060.45	71.28				16.15	p-cymene							16.279	1,8-Cineol			1029.08	Limonene			cis-β-Terpineol*	1067.55
18.671	cis-β-Terpineol*	18.671	cis-β-Terpineol*	18.671	cis-β-Terpineol*	5.671	5.671	75.671	1067.55	71.28				16.17	D-Limonene				16.944	β-trans-Ocimene		16.888	β-trans-Ocimene			1040.92	Z-Ocimene			1-Octanol	1075.49
19.187	1-Octanol	19.187	1-Octanol	19.187	1-Octanol	6.187	6.187	76.187	1075.49	71.28				16.944	β-trans-Ocimene				17.937	β-cis-Ocimene		17.535	β-cis-Ocimene	17.116	Benzeneacetaldehyde*	1056.31	E-Ocimene			cis-Linaloloxide*	1077.28
19.203	cis-Linaloloxide*	19.303	cis-Linaloloxide*	19.303	cis-Linaloloxide*	6.303	6.303	76.303	1077.28	71.28				17.937	β-cis-Ocimene				18.035	Melonal						1068.15	γ-Terpinen			β-Cymene*	1083.94
19.736	β-Cymene*	19.736	β-Cymene*	19.736	β-Cymene*	6.736	6.736	76.736	1083.94	71.28				18.7143	γ-Terpinen							17.762	β-Ocimene			1083.85	β-Cymene			Terpinolene	1090.29
20.149	Terpinolene	20.149	Terpinolene	20.149	Terpinolene	7.149	7.149	77.149	1090.29	71.28				19.7253	β-Cymene				18.7143	γ-Terpinen		18.209	γ-Terpinene			1092.62	Terpinolene			α,p-Dimethylstyrene	1091.38
20.22	α,p-Dimethylstyrene	20.22	α,p-Dimethylstyrene	20.22	α,p-Dimethylstyrene	7.22	7.22	77.22	1091.38	71.28				20.3013	Terpinolene				18.741	Terpineol, cis-β-		18.671	cis-β-Terpineol*			1113.11	1,3,8-p-Menthatriene			Linalool	1107.81
21.465	Linalool	21.465	Linalool	21.465	Linalool	8.465	8.465	78.465	1107.81	77.78	11			21.932	1,3,8-p-Menthatriene				19.203	1-Octanol		19.187	1-Octanol			1131.24	α-Pyronene*			Nonanal	1109.17
21.584	Nonanal	21.584	Nonanal	21.584	Nonanal	8.584	8.584	78.584	1109.17	77.78				23.524	α-Pyronene							19.303	cis-Linaloloxide*			1142.99	Allo-ocimene			Phenylethyl Alcohol	1116.24
22.204	Phenylethyl Alcohol	22.204	Phenylethyl Alcohol	22.204	Phenylethyl Alcohol	9.204	9.204	79.204	1116.24	77.78				24.5547	Allo-Ocimene				19.7253	β-Cymene		19.736	β-Cymene*			1068.62	Terpineol, cis- β*			1,3,8-p-Menthatriene*	1127.77
23.215	1,3,8-p-Menthatriene*	23.215	1,3,8-p-Menthatriene*	23.215	1,3,8-p-Menthatriene*	10.215	10.215	80.215	1127.77	77.78				27.063	Vinylcyclohexane				20.3013	Terpinolene		20.149	Terpinolene			1112.31	Linalool			2,4,6-Octatriene,3,4-dimethyl*	1131.17
23.514	2,4,6-Octatriene,3,4-dimethyl*	23.514	2,4,6-Octatriene,3,4-dimethyl*	23.514	2,4,6-Octatriene,3,4-dimethyl*	10.514	10.514	80.514	1131.17	77.78				31.254	Terpinolene							20.22	α,p-Dimethylstyrene			1117.45	Thujone*			Limonene oxide, cis	1136.62
23.992	Limonene oxide, cis	23.992	Limonene oxide, cis	23.992	Limonene oxide, cis	10.992	10.992	80.992	1136.62	77.78				46.739	Camphene				21.611	Nonanal		21.465	Linalool			1136.03	Limonene oxide, cis*			Limonene oxide, trans	1138.54
24.16	Limonene oxide, trans	24.16	Limonene oxide, trans	24.16	Limonene oxide, trans	11.16	11.16	81.16	1138.54	77.78				48.653	1-Decen-3-yne				21.8597	Linalool		21.584	Nonanal			1138.88	Limonene oxide, trans*			Benzyl nitrile	1139.6
24.253	Benzyl nitrile	24.253	Benzyl nitrile	24.253	Benzyl nitrile	11.253	11.253	81.253	1139.6	77.78				74.9383	Pseudolimonen							22.204	Phenylethyl Alcohol			1145.38	Citronellal			Lilac aldehyde B*	1154.36
25.547	Lilac aldehyde B*	25.547	Lilac aldehyde B*	25.547	Lilac aldehyde B*	12.547	12.547	82.547	1154.36	77.78				18.741	Terpineol, cis-β-				21.932	1,3,8-p-Menthatriene		23.215	1,3,8-p-Menthatriene*			1147.78	Isopulegol			Citronellal	1156.42
25.628	Citronellal	25.728	Citronellal	25.728	Citronellal	12.728	12.728	82.728	1156.42	77.78				21.8597	Linalool				22.307	Thujone						1155.87	Pinocarvone*			Naphthalene*	1159.86
26.03	Naphthalene*	26.03	Naphthalene*	26.03	Naphthalene*	13.03	13.03	83.03	1159.86	77.78				22.307	Thujone				23.524	α-Pyronene		23.514	2,4,6-Octatriene,3,4-dimethyl*			1161.46	Terpinen-4-ol			Umbellulone*	1175.67
27.416	Umbellulone*	27.416	Umbellulone*	27.416	Umbellulone*	14.416	14.416	84.416	1175.67	77.78				23.938	Limonene oxide, cis-				23.938	Limonene oxide, cis-		23.992	Limonene oxide, cis			1177.19	Umbellulone*			(-)-Terpinen-4-ol	1181.22
27.503	(-)-Terpinen-4-ol	27.903	(-)-Terpinen-4-ol	27.903	(-)-Terpinen-4-ol	14.903	14.903	84.903	1181.22	77.78				24.1877	Limonene oxide, trans-				24.1877	Limonene oxide, trans-		24.16	Limonene oxide, trans			1188.37	p-Cymen-8-ol*			p-Cymen-8-ol*	1189.37
28.618	p-Cymen-8-ol*	28.618	p-Cymen-8-ol*	28.618	p-Cymen-8-ol*	15.618	15.618	85.618	1189.37	77.78				24.755	Citronellal							24.253	Benzyl nitrile			1192.13	α-Terpineol			α-Terpineol	1192.41
28.884	α-Terpineol	28.884	α-Terpineol	28.884	α-Terpineol	15.884	15.884	85.884	1192.41	77.78				24.97	Isopulegol				24.5547	Allo-Ocimene				25.547	Lilac aldehyde B*	1198.4	p-Menth-8-en-2-one*			Myrtenal	1201.85
29.743	Myrtenal	29.743	Myrtenal	29.743	Myrtenal	16.743	16.743	86.743	1201.85	86.554	12			25.6807	Pinocarvone				24.755	Citronellal		25.728	Citronellal			1207.49	Carveol*			Dodecane	1204.98
30.069	Dodecane	30.069	Dodecane	30.069	Dodecane	17.069	17.069	87.069	1204.98	86.554				26.1663	(-)-Terpinen-4-ol				24.97	Isopulegol				26.03	Naphthalene*	1215.74	p-Menth-1-en-9-al*			trans-Dihydrocarvone*	1205.13
30.085	trans-Dihydrocarvone*	30.085	trans-Dihydrocarvone*	30.085	trans-Dihydrocarvone*	17.085	17.085	87.085	1205.13	86.554				27.552	Umbellulone				25.6807	Pinocarvone				27.416	Umbellulone*	1219.67	cis-Carveol*			Carvone*	1206.41
30.118	Carvone*	30.218	Carvone*	30.218	Carvone*	17.218	17.218	87.218	1206.41	86.554				28.531	p-Cymen-8-ol				26.1663	(-)-Terpinen-4-ol		27.903	(-)-Terpinen-4-ol			1230.81	cis-Geraniol			trans-Piperitol*	1209.72
30.563	trans-Piperitol*	30.563	trans-Piperitol*	30.563	trans-Piperitol*	17.563	17.563	87.563	1209.72	86.554				28.8643	α-Terpineol				27.063	Vinylcyclohexane						1237.14	β-Citronellol			Decanal	1213.53
30.96	Decanal	30.96	Decanal	30.96	Decanal	17.96	17.96	87.96	1213.53	86.554				29.4133	p-Menth-8-en-2-one				27.482	Naphthalene						1239.35	Methyl thymyl ether			p-Menth-1-en-9-al*	1215.31
31.145	p-Menth-1-en-9-al*	31.145	p-Menth-1-en-9-al*	31.145	p-Menth-1-en-9-al*	18.145	18.145	88.145	1215.31	86.554				30.33	Carveol				27.552	Umbellulone						1242.51	β-Citral			cis-Carveol	1219.48
31.58	cis-Carveol	31.58	cis-Carveol	31.58	cis-Carveol	18.58	18.58	88.58	1219.48	86.554				31.188	p-Menth-1-en-9-al				28.531	p-Cymen-8-ol		28.618	p-Cymen-8-ol*			1252.02	p-Menth-1-en-3-one			cis-Geraniol	1230.38
32.716	cis-Geraniol	32.716	cis-Geraniol	32.716	cis-Geraniol	19.716	19.716	89.716	1230.38	86.554				31.598	cis-Carveol				28.8643	α-Terpineol		28.884	α-Terpineol			1257.87	trans-Geraniol			β-Citronellol	1232.57
32.944	β-Citronellol	32.944	β-Citronellol	32.944	β-Citronellol	19.944	19.944	89.944	1232.57	86.554				32.761	cis-Geraniol				29.4133	p-Menth-8-en-2-one		29.743	Myrtenal			1268.33	α-Citral			Methyl thymyl ether	1236.49
33.352	Methyl thymyl ether	33.352	Methyl thymyl ether	33.352	Methyl thymyl ether	20.352	20.352	90.352	1236.49	86.554				33.4207	β-Citronellol							30.069	Dodecane			1284.93	α-Thujenal*			Isogeraniol*	1237.48
33.455	Isogeraniol*	33.455	Isogeraniol*	33.455	Isogeraniol*	20.455	20.455	90.455	1237.48	86.554				33.651	Methyl thymyl ether							30.085	trans-Dihydrocarvone*			1300.36	p-Mentha-1(7),8(10)-dien-9-ol*			β-Citral	1242.38
33.966	β-Citral	33.966	β-Citral	33.966	β-Citral	20.966	20.966	90.966	1242.38	86.554				33.982	β-Citral				30.33	Carveol				30.218	Carvone*	1305	Carvacrol			Chrysanthenone*	1249.73
34.732	Chrysanthenone*	34.732	Chrysanthenone*	34.732	Chrysanthenone*	21.732	21.732	91.732	1249.73	86.554				34.9737	p-Menth-1-en-3-one									30.563	trans-Piperitol*	1754.9	E,E-Farnesal			trans-Geraniol	1258.08
35.602	trans-Geraniol	35.602	trans-Geraniol	35.602	trans-Geraniol	22.602	22.602	92.602	1258.08	86.554				35.5767	trans-Geraniol				30.6103	Decanal		30.96	Decanal			1334.88	Ylangene*			Prenyl acetate*	1268.41
36.678	Prenyl acetate*	36.678	Prenyl acetate*	36.678	Prenyl acetate*	23.678	23.678	93.678	1268.41	86.554				36.671	α-Citral				31.188	p-Menth-1-en-9-al		31.145	p-Menth-1-en-9-al*			1336.23	δ-Elemene			α-Citral	1273.11
37.168	α-Citral	37.168	α-Citral	37.168	α-Citral	24.168	24.168	94.168	1273.11	86.554				38.404	α-Thujenal				31.254	Terpinolene						1347.05	α-Cubebene			2-Caren-10-al*	1281.13
38.004	2-Caren-10-al*	38.004	2-Caren-10-al*	38.004	2-Caren-10-al*	25.004	25.004	95.004	1281.13	86.554				40.0053	Thymol				31.477	Acetic acid, octyl ester						1366.64	Copaene			Indole	1292.25
39.162	Indole	39.162	Indole	39.162	Indole	26.162	26.162	96.162	1292.25	86.554				40.6347	Carvacrol				31.598	cis-Carveol		31.58	cis-Carveol			1378.62	β-Bourbonene			Thymol	1297.94
39.755	Thymol	39.755	Thymol	39.755	Thymol	26.755	26.755	96.755	1297.94	86.554				43.342	Myrtenol				32.761	cis-Geraniol		32.716	cis-Geraniol			1393.02	β-Elemene			Carvacrol*	1298.66
39.82	Carvacrol*	39.82	Carvacrol*	39.82	Carvacrol*	26.82	26.82	96.82	1298.66	96.9703	13			53.345	Chrysanthenone				33.4207	β-Citronellol		32.944	β-Citronellol			1408.67	Zingiberene*			Tridecane	1304.83
40.51	Tridecane	40.51	Tridecane	40.51	Tridecane	27.51	27.51	97.51	1304.83	96.9703				77.734	E,E-Farnesal				33.651	Methyl thymyl ether		33.352	Methyl thymyl ether			1414.87	Caryophyllene			Methyl geranate	1306.14
40.657	Methyl geranate	40.657	Methyl geranate	40.657	Methyl geranate	27.657	27.657	97.657	1306.14	96.9703				43.873	Elixene							33.455	Isogeraniol*			1419.47	(Z)-α-Bergamotene*			Undecanal	1311.25
41.228	Undecanal	41.228	Undecanal	41.228	Undecanal	28.228	28.228	98.228	1311.25	96.9703				44.0203	δ-Elemene				33.982	β-Citral		33.966	β-Citral			1422.92	β-Cubebene			δ-Elemene	1335.47
43.935	δ-Elemene	43.935	δ-Elemene	43.935	δ-Elemene	30.935	30.935	100.935	1335.47	96.9703				45.228	α-Cubebene				34.9737	p-Menth-1-en-3-one				34.732	Chrysanthenone*	1425.84	α-Elemene*			α-Cubebene*	1336
43.995	α-Cubebene*	43.995	α-Cubebene*	43.995	α-Cubebene*	30.995	30.995	100.995	1336	96.9703				47.4223	Copaene				35.5767	trans-Geraniol		35.602	trans-Geraniol			1430.88	Aromadendrene			Methyl anthranilate	1340.76
44.527	Methyl anthranilate	44.527	Methyl anthranilate	44.527	Methyl anthranilate	31.527	31.527	101.527	1340.76	96.9703				48.756	β-Bourbonene							36.678	Prenyl acetate*			1432.57	g-Elemene*			Citronellyl propionate*	1347.23
45.25	Citronellyl propionate*	45.25	Citronellyl propionate*	45.25	Citronellyl propionate*	32.25	32.25	102.25	1347.23	96.9703				50.372	β-Elemen				36.671	α-Citral		37.168	α-Citral			1435.4	α-Guaiene*			Nerol acetate	1364.86
47.821	Nerol acetate	47.221	Nerol acetate	47.221	Nerol acetate	34.221	34.221	104.221	1364.86	96.9703				52.1277	(-)-Zingiberene				38.404	α-Thujenal				38.004	2-Caren-10-al*	1440.71	α-Himachalene*			Copaene*	1370.66
47.87	Copaene*	47.87	Copaene*	47.87	Copaene*	34.87	34.87	104.87	1370.66	96.9703				52.8267	Caryophyllene				38.467	Indole		39.162	Indole			1449.65	α-Caryophyllene			Geranyl acetate	1389.8
50.01	Geranyl acetate	50.01	Geranyl acetate	50.01	Geranyl acetate	37.01	37.01	107.01	1389.8	96.9703				53.744	β-Cubebene				39.1317	Phenyl-but-3-en-1-ol						1451.95	Allo-aromadendrene			β-Elemene	1392.25
50.283	β-Elemene	50.283	β-Elemene	50.283	β-Elemene	37.283	37.283	107.283	1392.25	96.9703				54.066	α-Elemene				39.726	p-Thymol		39.755	Thymol			1456.14	Bicyclosesquiphellandrene*			cis-Jasmone	1397.79
50.903	cis-Jasmone	50.903	cis-Jasmone	50.903	cis-Jasmone	37.903	37.903	107.903	1397.79	96.9703				54.6407	(-)-Alloaromadendrene				40.0053	Thymol						1457.17	β-Santalene*			(-)-Zingiberene*	1398.23
50.952	(-)-Zingiberene*	50.952	(-)-Zingiberene*	50.952	(-)-Zingiberene*	37.952	37.952	107.952	1398.23	108.155	14			54.831	γ-Elemene				40.6347	Carvacrol		39.82	Carvacrol*			1462.3	β-Farnesene			Bergamotene*	1406.86
51.925	Bergamotene*	51.925	Bergamotene*	51.925	Bergamotene*	38.925	38.925	108.925	1406.86	108.155				55.1497	α-Guaiene							40.51	Tridecane			1470.44	γ-Selinene*			trans-α-Bergamotene	1407.73
52.023	trans-α-Bergamotene	52.023	trans-α-Bergamotene	52.023	trans-α-Bergamotene	39.023	39.023	109.023	1407.73	108.155				55.751	(+)-δ-Cadinene							40.657	Methyl geranate			1474.51	Germacrene D			Caryophyllene	1412.39
52.55	Caryophyllene	52.55	Caryophyllene	52.55	Caryophyllene	39.55	39.55	109.55	1412.39	108.155				56.764	α-Caryophyllene				41.299	Undecanal		41.228	Undecanal			1478.32	β-Selinene			α-Santalene*	1417.25
53.099	α-Santalene*	53.099	α-Santalene*	53.099	α-Santalene*	40.099	40.099	110.099	1417.25	108.155				57.023	Allo-Aromadendrene				43.1397	Methyl geranate						1481.24	γ-Himachalene			β-Cubebene	1422.44
53.686	β-Cubebene	53.686	β-Cubebene	53.686	β-Cubebene	40.686	40.686	110.686	1422.44	108.155				57.599	β-Santalene				43.342	Myrtenol						1487.7	α-Selinene			γ-Elemene	1430.9
54.642	γ-Elemene	54.642	γ-Elemene	54.642	γ-Elemene	41.642	41.642	111.642	1430.9	108.155				57.4677	(+)-Epi-bicyclosesquiphellandrene				43.873	Elixene						1493.1	δ-Guaiene*			α-Bergamotene	1434.61
55.061	α-Bergamotene	55.061	α-Bergamotene	55.061	α-Bergamotene	42.061	42.061	112.061	1434.61	108.155				58.1933	β-Farnesene				44.0203	δ-Elemene		43.935	δ-Elemene			1496.19	α-Muurolene			α-Caryophyllene	1445
56.235	α-Caryophyllene	56.235	α-Caryophyllene	56.235	α-Caryophyllene	43.235	43.235	113.235	1445	108.155				59.11	γ-Selinene				45.228	α-Cubebene		43.995	α-Cubebene*			1496.97	β-Gurjunene			(+)-Epi-bicyclosesquiphellandrene*	1455.82
57.458	(+)-Epi-bicyclosesquiphellandrene*	57.458	(+)-Epi-bicyclosesquiphellandrene*	57.458	(+)-Epi-bicyclosesquiphellandrene*	44.458	44.458	114.458	1455.82	108.155				59.5707	Germacrene D				46.729	Citronellol acetate				44.527	Methyl anthranilate	1500.17	α-Bulnesene*			β-Farnesene	1461.26
58.072	β-Farnesene	58.072	β-Farnesene	58.072	β-Farnesene	45.072	45.072	115.072	1461.26	108.155				60.002	β-Selinene				46.739	Camphene				45.25	Citronellyl propionate*	1501.08	β-Cadinene			α-Gurjunene*	1463.81
58.36	α-Gurjunene*	58.36	α-Gurjunene*	58.36	α-Gurjunene*	45.36	45.36	115.36	1463.81	108.155				60.3313	β-Gurjunene				47.4223	Copaene						1501.79	cis-α-Bisabolene*			α-Elemene*	1470.01
59.061	α-Elemene*	59.061	α-Elemene*	59.061	α-Elemene*	46.061	46.061	116.061	1470.01	108.155				61.06	α-Selinene				47.772	Nerol acetate		47.221	Nerol acetate			1503.46	α-Amorphene			Germacrene D	1473.91
59.502	Germacrene D	59.502	Germacrene D	59.502	Germacrene D	46.502	46.502	116.502	1473.91	108.155				61.671	δ-Guaiene				48.653	1-Decen-3-yne						1503.63	γ-Muurolene			β-Eudesmene*	1475.35
59.665	β-Eudesmene*	59.665	β-Eudesmene*	59.665	β-Eudesmene*	46.665	46.665	116.665	1475.35	108.155				62.018	α-Muurolene				48.756	β-Bourbonene						1504.67	β-Bisabolene			α-Selinene*	1477.71
59.931	α-Selinene*	59.931	α-Selinene*	59.931	α-Selinene*	46.931	46.931	116.931	1477.71	108.155				62.035	β-Gurjunene							47.87	Copaene*			1505.67	α-Farnesene*			Allo-Aromadendrene	1480.79
60.279	Allo-Aromadendrene	60.279	Allo-Aromadendrene	60.279	Allo-Aromadendrene	47.279	47.279	117.279	1480.79	108.155				62.491	α-Bulnesene							50.01	Geranyl acetate			1508.96	δ-Cadinene			Bicyclogermacrene	1489.11
61.219	Bicyclogermacrene	61.219	Bicyclogermacrene	61.219	Bicyclogermacrene	48.219	48.219	118.219	1489.11	108.155				62.714	δ-Cadinene				50.372	β-Elemen		50.283	β-Elemene			1510.25	β-Sesquiphellandrene			Germacrene B*	1491.17
61.252	Germacrene B*	61.452	Germacrene B*	61.452	Germacrene B*	48.452	48.452	118.452	1491.17	108.155				62.877	cis-α-Bisabolene				50.8993	Safranal						1511.88	8-Isopropenyl-1,5-dimethyl-cyclodeca-1,5-diene*			α-Bulnesene*	1496.23
62.024	α-Bulnesene*	62.024	α-Bulnesene*	62.024	α-Bulnesene*	49.024	49.024	119.024	1496.23	108.155				63.3213	γ-Muurolene				51.001	cis-Jasmone		50.903	cis-Jasmone			1514.13	Valencen			(Z,E)-α-Farnesene	1497.81
62.372	(Z,E)-α-Farnesene	62.202	(Z,E)-α-Farnesene	62.202	(Z,E)-α-Farnesene	49.202	49.202	119.202	1497.81	108.155				63.567	β-Bisabolene				52.1277	(-)-Zingiberene		50.952	(-)-Zingiberene*			1514.8	Eudesma-3,7(11)-diene*			Pentadecane	1501.17
62.731	Pentadecane	62.731	Pentadecane	62.731	Pentadecane	49.731	49.731	119.731	1501.17	119.451	15			63.279	α-Amorphene							51.925	Bergamotene*			1525.64	α-Panasinsene*			γ-Muurolene	1502.39
63.024	γ-Muurolene	63.024	γ-Muurolene	63.024	γ-Muurolene	50.024	50.024	120.024	1502.39	119.451				63.807	α-Farnesene							52.023	trans-α-Bergamotene			1531.94	(E,Z)- α-Farnesene			δ-Cadinene	1503.66
63.328	δ-Cadinene	63.328	δ-Cadinene	63.328	δ-Cadinene	50.328	50.328	120.328	1503.66	119.451				64.6	δ-Cadinene				52.8267	Caryophyllene		52.55	Caryophyllene			1643.48	Cadalene*			β-Bisabolene	1504.02
63.415	β-Bisabolene	63.415	β-Bisabolene	63.415	β-Bisabolene	50.415	50.415	120.415	1504.02	119.451				64.905	β-Sesquiphellandrene				53.345	Chrysanthenone						1530.14	Nerolidol-2			α-Farnesene*	1505.77
63.834	α-Farnesene*	63.834	α-Farnesene*	63.834	α-Farnesene*	50.834	50.834	120.834	1505.77	119.451				65.301	α-Cedrene							53.099	α-Santalene*			1531.01	Germacrene D-4-ol			β-Sesquiphellandrene	1507.2
64.877	β-Sesquiphellandrene	64.177	β-Sesquiphellandrene	64.177	β-Sesquiphellandrene	51.177	51.177	121.177	1507.2	119.451				65.356	Valencen				53.744	β-Cubebene		53.686	β-Cubebene			1587.2	Caryophyllene oxide			Eudesma-3,7(11)-diene*	1510.3
64.921	Eudesma-3,7(11)-diene*	64.921	Eudesma-3,7(11)-diene*	64.921	Eudesma-3,7(11)-diene*	51.921	51.921	121.921	1510.3	119.451				66.0027	Eudesma-3,7(11)-diene				54.066	α-Elemene		54.642	γ-Elemene			1592.04	α-Humulene oxide*			cis-α-Bisabolene*	1519.7
67.176	cis-α-Bisabolene*	67.176	cis-α-Bisabolene*	67.176	cis-α-Bisabolene*	54.176	54.176	124.176	1519.7	119.451				68.601	β-Maaliene				54.6407	(-)-Alloaromadendrene						1613.62	Cubenol*			Nerolidol	1529.38
69.699	Nerolidol	69.499	Nerolidol	69.499	Nerolidol	56.499	56.499	126.499	1529.38	119.451				69.9247	(E,Z)-α-Farnesene				54.831	γ-Elemene						1626.16	Spathulenol			Caryophyllene oxide	1531.14
69.721	Caryophyllene oxide	69.921	Caryophyllene oxide	69.921	Caryophyllene oxide	56.921	56.921	126.921	1531.14	119.451				71.525	Squalene				55.1497	α-Guaiene				55.061	α-Bergamotene	1657.32	β-Eudesmol			Pentadecane, 3-methyl-*	1534.63
70.758	Pentadecane, 3-methyl-*	70.758	Pentadecane, 3-methyl-*	70.758	Pentadecane, 3-methyl-*	57.758	57.758	127.758	1534.63	119.451				73.913	γ-Cadinene				55.751	(+)-δ-Cadinene						1764.71	α-Sinensal			Hexadecane	1610.99
73.819	Hexadecane	73.819	Hexadecane	73.819	Hexadecane	13.819	13.819	143.819	1610.99	143.442	16			69.684	Nerolidol-2				56.764	α-Caryophyllene		56.235	α-Caryophyllene			1398.66	cis-Jasmone*			β-Eudesmol*	1657.62
75.428	β-Eudesmol*	75.428	β-Eudesmol*	75.428	β-Eudesmol*	15.428	15.428	145.428	1657.62	143.442				69.894	Germacrene D-4-ol				57.023	Allo-Aromadendrene						1484.42	β-Ionone*			Methyl jasmonate*	1665.33
75.694	Methyl jasmonate*	75.694	Methyl jasmonate*	75.694	Methyl jasmonate*	15.694	15.694	145.694	1665.33	143.442				70.3653	Caryophyllene oxide				57.4677	(+)-Epi-bicyclosesquiphellandrene		57.458	(+)-Epi-bicyclosesquiphellandrene*			1218.52	Acetic acid, octyl ester*			Hexadecane, 2-methyl-*	1680.46
76.216	Hexadecane, 2-methyl-*	76.216	Hexadecane, 2-methyl-*	76.216	Hexadecane, 2-methyl-*	16.216	16.216	146.216	1680.46	143.442				74.743	Spathulenol				57.599	β-Santalene						1328.35	Methyl geranate			8-Heptadecene	1688.81
76.504	8-Heptadecene	76.504	8-Heptadecene	76.504	8-Heptadecene	16.504	16.504	146.504	1688.81	143.442				75.422	β-Eudesmol				58.1933	β-Farnesene		58.072	β-Farnesene			1330	Mrtenyl acetate*			Tetradecanal*	1697.68
76.51	Tetradecanal*	76.81	Tetradecanal*	76.81	Tetradecanal*	16.81	16.81	146.81	1697.68	143.442				77.879	α-Sinensal				59.11	γ-Selinene				58.36	α-Gurjunene*	1360.47	Citronellol acetate			Heptadecane	1708.17
77.015	Heptadecane	77.015	Heptadecane	77.015	Heptadecane	17.015	17.015	147.015	1708.17	146.893	17			31.477	Acetic acid, octyl ester									59.061	α-Elemene*	1369.77	Nerol acetate			E,E-Farnesal*	1733.01
77.395	E,E-Farnesal*	77.395	E,E-Farnesal*	77.395	E,E-Farnesal*	17.395	17.395	147.395	1733.01	146.893				43.1397	Methyl geranate				59.5707	Germacrene D		59.502	Germacrene D			1397.76	Geranyle acetate*			Farnesol	1740.65
77.412	Farnesol	77.512	Farnesol	77.512	Farnesol	17.512	17.512	147.512	1740.65	146.893				46.729	Citronellol acetate							59.665	β-Eudesmene*			876.943	Styrene*			Heptadecane, 3-methyl-*	1753.66
77.711	Heptadecane, 3-methyl-*	77.711	Heptadecane, 3-methyl-*	77.711	Heptadecane, 3-methyl-*	17.711	17.711	147.711	1753.66	146.893				47.772	Nerol acetate											1176.4	Naphthalene*			α-Sinensal	1764.97
77.884	α-Sinensal	77.884	α-Sinensal	77.884	α-Sinensal	17.884	17.884	147.884	1764.97	146.893				51.001	cis-Jasmone				60.002	β-Selinene		59.931	α-Selinene*			996.01	Phenol*			Octadecane*	1808.8
78.515	Octadecane*	78.515	Octadecane*	78.515	Octadecane*	18.515	18.515	148.515	1808.8	148.424	18			60.6943	β-Ionone				60.3313	β-Gurjunene		60.279	Allo-Aromadendrene			1297.7	p-Thymol*			β-Gurjunene	1826.94
78.711	β-Gurjunene	78.711	β-Gurjunene	78.711	β-Gurjunene	18.711	18.711	148.711	1826.94	148.424				8.60967	Styrene				60.6943	β-Ionone						1075.69	1-Octanol
														27.482	Naphthalene				61.06	α-Selinene				61.219	Bicyclogermacrene	1291.94	Phenyl-but-3-en-1-ol*
														13.806	Phenol				61.671	δ-Guaiene				61.452	Germacrene B*	1171.61	Vinylcyclohexane*
														39.726	p-Thymol				62.018	α-Muurolene						1377.64	1-Decen-3-yne*
														19.203	1-Octanol				62.035	β-Gurjunene						1285.6	Indole
														39.1317	Phenyl-but-3-en-1-ol				62.491	α-Bulnesene		62.024	α-Bulnesene*
														38.467	Indole							62.202	(Z,E)-α-Farnesene
																			62.714	δ-Cadinene
																			62.877	cis-α-Bisabolene
																			63.279	α-Amorphene				62.731	Pentadecane
																			63.3213	γ-Muurolene		63.024	γ-Muurolene
																						63.328	δ-Cadinene
																			63.567	β-Bisabolene		63.415	β-Bisabolene
																			63.807	α-Farnesene		63.834	α-Farnesene*
																			64.6	δ-Cadinene
																			64.905	β-Sesquiphellandrene		64.177	β-Sesquiphellandrene
																			65.301	α-Cedrene
																			65.356	Valencen
																			66.0027	Eudesma-3,7(11)-diene		64.921	Eudesma-3,7(11)-diene*	67.176	cis-α-Bisabolene*
																			68.601	β-Maaliene
																			69.684	Nerolidol-2		69.499	Nerolidol		70.758
																			69.894	Germacrene D-4-ol					73.819
																			69.9247	(E,Z)-α-Farnesene
																			70.3653	Caryophyllene oxide		69.921	Caryophyllene oxide		75.694
																			71.525	Squalene					76.216
																			73.913	γ-Cadinene					76.504
																			74.743	Spathulenol					76.81
																			74.9383	Pseudolimonen					77.015
																			75.422	β-Eudesmol		75.428	β-Eudesmol*
																			77.734	E,E-Farnesal		77.395	E,E-Farnesal*
																						77.512	Farnesol
																						77.711	Heptadecane, 3-methyl-*
																			77.879	α-Sinensal		77.884	α-Sinensal
																						78.515	Octadecane*
																						78.711	β-Gurjunene

## Sheet: Sheet3
					RIa	RTb	Compound Name	FCd		RIa	RTb	Compound Name	FCd			RTb	Compound Name	c			808.912	5.984	Hexanal
						flower						leave				5.984	Hexanal				858.342	7.892	2-Hexenal*
808.912	5.984	Hexanal	A1		808.912	5.984	Hexanal	A1		809.067	5.98967	Hexanal	A1			7.892	2-Hexenal*	1-Hexanol			896.788	9.376	Styrene*
858.342	7.892	2-Hexenal*	A2		858.342	7.892	2-Hexenal*	A2		858.29	7.89033	2-Hexenal	A2			9.376	Styrene*	alpha-Pinene			938.506	11.012	α-Thujene
977.267	12.534	Benzaldehyde	A3		977.267	12.534	Benzaldehyde	A3		911.46	9.947	Heptanal	A3			11.012	α-Thujene	beta-Pinene			945.025	11.268	α-Pinene
1043.63	17.116	Benzeneacetaldehyde*	A4	ok	1043.63	17.116	Benzeneacetaldehyde*	A4		921.138	10.333	2,4-Hexadienal, (E,E)*c	A4			11.268	α-Pinene	beta-Myrcene			962.19	11.942	Camphene
1109.17	21.584	Nonanal	A5		1109.17	21.584	Nonanal	A5		978.438	12.577	Benzaldehyde*	A5			11.942	Camphene	α-Terpinene			977.267	12.534	Benzaldehyde
1154.36	25.547	Lilac aldehyde B*	A6	ok	1154.36	25.547	Lilac aldehyde B*	A6		1057.69	18.035	Melonal*	A6			12.534	Benzaldehyde	D-Limonene			979	13.197	Sabinene
1201.85	29.743	Myrtenal	A7	ok	1201.85	29.743	Myrtenal	A7		1109.46	21.611	Nonanal	A7			13.197	Sabinene	β-trans-Ocimene			991.358	13.262	β-Pinene
1213.53	30.96	Decanal	A8		1213.53	30.96	Decanal	A8		1210.17	30.6103	Decanal	A8			13.262	β-Pinene	β-cis-Ocimene			999.253	14.192	β-Myrcene
1311.25	41.228	Undecanal	A9		1311.25	41.228	Undecanal	A9		1311.9	41.299	Undecanal	A9			14.192	β-Myrcene	γ-Terpinene			1018.22	15.464	α-Terpinene
1075.49	19.187	1-Octanol	Ac1													15.464	α-Terpinene	1-Octanol			1025.4	15.931	p-Cymene
1116.24	22.204	Phenylethyl Alcohol	Ac2		938.506	11.012	α-Thujene	Mh1		922.156	10.3723	α-Thujene	MH1			15.931	p-Cymene	Terpinolene			1029.08	16.17	Limonene
896.788	9.376	Styrene*	Ah1		945.025	11.268	α-Pinene	Mh2		945.331	11.2803	α-Pinene	MH2			16.17	Limonene	Linalool			1030.75	16.279	1,8-Cineol
1091.38	20.22	α,p-Dimethylstyrene	Ah2		962.19	11.942	Camphene	Mh3		962.394	11.949	Camphene	MH3			16.279	1,8-Cineol	1-Terpinen-4-ol			1040.12	16.888	β-trans-Ocimene
1159.86	26.03	Naphthalene*	Ah3		979	13.197	Sabinene	Mh4		992.275	13.3747	β-Pinene	MH4			16.888	β-trans-Ocimene	α-Terpineol			1043.63	17.116	Benzeneacetaldehyde*
1534.63	70.758	Pentadecane, 3-methyl-*	Ak3		991.358	13.262	β-Pinene	Mh5		992.615	13.4123	β-Terpinene	MH5			17.116	Benzeneacetaldehyde*	cis-Geraniol			1044.08	17.535	β-cis-Ocimene
1680.46	76.216	Hexadecane, 2-methyl-*	Ak5		999.253	14.192	β-Myrcene	Mh6		997	14.199	β-Myrcene	MH6			17.535	β-cis-Ocimene	β-Citral			1050.49	17.562	β-Ocimene
1688.81	76.504	8-Heptadecene	Ak6		1018.22	15.464	α-Terpinene	Mh7		1011.38	15.023	α-Phellandrene	MH7			17.562	β-Ocimene	trans-Geraniol			1060.45	18.209	γ-Terpinene
1808.8	78.515	Octadecane, 2-methyl*	Ak9		1025.4	15.931	p-Cymene	Mh8		1013.08	15.1303	3-Carene	MH8			18.209	γ-Terpinene	α-Citral			1067.55	18.671	cis-β-Terpineol*
1665.33	75.694	Methyl jasmonate*	DFG		1029.08	16.17	Limonene	Mh9		1018.92	15.5147	α-Terpinen	MH9			18.671	cis-β-Terpineol*	Caryophyllene			1075.49	19.187	1-Octanol
1268.41	36.678	Prenyl acetate*	E1		1040.12	16.888	β-trans-Ocimene	Mh10		1028.77	16.15	p-Cymene	MH10			19.187	1-Octanol	Valencene			1075.74	19.203	cis-Linaloloxide*
1306.14	40.657	Methyl geranate	E2		1044.08	17.535	β-cis-Ocimene	Mh11		1029.08	16.17	Limonene	MH11			19.203	cis-Linaloloxide*	Farnesene			1083.94	19.736	β-Cymene*
1347.23	45.25	Citronellyl propionate*	E3	ok	1050.49	17.562	β-Ocimene	Mh12		1040.92	16.944	Z-Ocimene	MH12			19.736	β-Cymene*	S (+) Carvone			1090.29	20.149	Terpinolene
1370.22	47.821	Nerol acetate	E4		1060.45	18.209	γ-Terpinene	Mh13		1056.31	17.937	E-Ocimene	MH13			20.149	Terpinolene	Neryl acetate			1091.38	20.22	α,p-Dimethylstyrene
1389.8	50.01	Geranyl acetate	E5		1083.94	19.736	β-Cymene*	Mh14		1068.15	18.7143	γ-Terpinen	MH14			20.22	α,p-Dimethylstyrene	Isopulegol			1107.81	21.465	Linalool
1124.73	22.25	Chrysanthenone*	K1		1090.29	20.149	Terpinolene	Mh15		1083.85	19.7253	β-Cymene	MH15			21.465	Linalool	Limonene oxide(cis, trans)			1109.17	21.584	Nonanal
1394.79	50.603	cis-Jasmone	K2		1127.77	23.215	1,3,8-p-Menthatriene*	Mh16		1092.62	20.3013	Terpinolene	MH16			21.584	Nonanal	a-terpinene			1116.24	22.204	Phenylethyl Alcohol
938.506	11.012	α-Thujene	Mh1		1131.17	23.514	2,4,6-Octatriene,3,4-dimethyl*	Mh17		1113.11	21.932	1,3,8-p-Menthatriene	MH17			22.204	Phenylethyl Alcohol	geranyl acetate			1124.73	22.25	Chrysanthenone*
1040.12	16.888	β-trans-Ocimene	Mh10	de	1204.98	30.069	Dodecane	Mh18		1131.24	23.524	α-Pyronene*	MH18			23.215	1,3,8-p-Menthatriene*	carvacorl			1127.77	23.215	1,3,8-p-Menthatriene*
1046.08	17.535	β-cis-Ocimene	Mh11							1142.99	24.5547	Allo-ocimene	MH19			23.514	2,4,6-Octatriene,3,4-dimethyl*	trans-trans-farnesene			1131.17	23.514	2,4,6-Octatriene,3,4-dimethyl*
1050.49	17.562	β-Ocimene	Mh12													23.992	Limonene oxide, cis	Thymol			1136.62	23.992	Limonene oxide, cis
1060.45	18.209	γ-Terpinene	Mh13	ok	1030.75	16.279	1,8-Cineol	Om1		1068.62	18.741	Terpineol, cis- β*	OM1			24.16	Limonene oxide, trans	Farnesol			1138.54	24.16	Limonene oxide, trans
1083.94	19.736	β-Cymene*	Mh14		1067.55	18.671	cis-β-Terpineol*	Om2		1112.31	21.8597	Linalool	OM2			24.253	Benzyl nitrile	(+) terpinen-4-ol			1139.6	24.253	Benzyl nitrile
1090.29	20.149	Terpinolene	Mh15	ok	1075.74	19.203	cis-Linaloloxide*	Om3		1117.45	22.307	Thujone*	OM3			25.547	Lilac aldehyde B*	citronellal			1154.36	25.547	Lilac aldehyde B*
1127.77	23.215	1,3,8-p-Menthatriene*	Mh16		1107.81	21.465	Linalool	Om4		1136.03	23.938	Limonene oxide, cis*	OM4			25.628	Citronellal	b-citronella			1155.28	25.628	Citronellal
1131.17	23.514	2,4,6-Octatriene,3,4-dimethyl*	Mh17		1136.62	23.992	Limonene oxide, cis	Om5		1138.88	24.1877	Limonene oxide, trans*	OM5			26.03	Naphthalene*	Geraniol			1159.86	26.03	Naphthalene*
945.025	11.268	α-Pinene	Mh2		1138.54	24.16	Limonene oxide, trans	Om6		1145.38	24.755	Citronellal	OM6			27.416	Umbellulone*	R(+) Limoenene			1175.67	27.416	Umbellulone*
962.19	11.942	Camphene	Mh3		1155.28	25.628	Citronellal	Om7		1147.78	24.97	Isopulegol	OM7			27.503	(-)-Terpinen-4-ol	L-Menthol			1176.66	27.503	(-)-Terpinen-4-ol
979	13.197	Sabinene	Mh4		1175.67	27.416	Umbellulone*	Om8		1155.87	25.6807	Pinocarvone*	OM8			28.618	p-Cymen-8-ol*	m-cymene			1189.37	28.618	p-Cymen-8-ol*
991.358	13.262	β-Pinene	Mh5		1176.66	27.503	(-)-Terpinen-4-ol	Om9		1161.46	26.1663	Terpinen-4-ol	OM9			28.884	α-Terpineol	p-cymene			1192.41	28.884	α-Terpineol
999.253	14.192	β-Myrcene	Mh6		1189.37	28.618	p-Cymen-8-ol*	Om10		1177.19	27.552	Umbellulone*	OM10			29.743	Myrtenal	Cyclohexane			1201.85	29.743	Myrtenal
1018.22	15.464	α-Terpinene	Mh7		1192.41	28.884	α-Terpineol	Om11		1188.37	28.531	p-Cymen-8-ol*	OM11			30.069	Dodecane	1-Deconal			1205.13	30.085	trans-Dihydrocarvone*
1025.4	15.931	p-Cymene	Mh8	ok	1205.13	30.085	trans-Dihydrocarvone*	Om12		1192.13	28.8643	α-Terpineol	OM12			30.085	trans-Dihydrocarvone*	2,6, dimethyle 2,4,6 octatrine			1209.72	30.563	trans-Piperitol*
1029.08	16.17	Limonene	Mh9	ok	1208.45	30.118	Carvone*	Om13		1198.4	29.4133	p-Menth-8-en-2-one*	OM13			30.118	Carvone*	Butyl acetate			1213.53	30.96	Decanal
1139.6	24.253	Benzyl nitrile	N1	ok	1209.72	30.563	trans-Piperitol*	Om14		1207.49	30.33	Carveol*	OM14			30.563	trans-Piperitol*	Benzenaldehyde			1215.31	31.145	p-Menth-1-en-9-al*
1292.25	39.162	Indole	N2		1215.31	31.145	p-Menth-1-en-9-al*	Om15		1215.74	31.188	p-Menth-1-en-9-al*	OM15			30.96	Decanal	trans-caryophyllene			1219.48	31.58	cis-Carveol
1340.76	44.527	Methyl anthranilate	N3		1219.48	31.58	cis-Carveol	Om16		1219.67	31.598	cis-Carveol*	OM16			31.145	p-Menth-1-en-9-al*				1230.38	32.716	cis-Geraniol
1030.75	16.279	1,8-Cineol	Om1		1230.38	32.716	cis-Geraniol	Om17		1230.81	32.761	cis-Geraniol	OM17			31.58	cis-Carveol				1232.57	32.944	β-Citronellol
1189.37	28.618	p-Cymen-8-ol*	Om10		1232.57	32.944	β-Citronellol	Om18		1237.14	33.4207	β-Citronellol	OM18			32.716	cis-Geraniol				1236.49	33.352	Methyl thymyl ether
1192.41	28.884	α-Terpineol	Om11		1236.49	33.352	Methyl thymyl ether	Om19		1239.35	33.651	Methyl thymyl ether	OM19			32.944	β-Citronellol				1237.48	33.455	Isogeraniol*
1205.13	30.085	trans-Dihydrocarvone*	Om12	ok	1237.48	33.455	Isogeraniol*	Om20		1242.51	33.982	β-Citral	OM20			33.352	Methyl thymyl ether				1242.38	33.966	β-Citral
1208.45	30.118	Carvone*	Om13		1242.38	33.966	β-Citral	Om21		1252.02	34.9737	p-Menth-1-en-3-one	OM21			33.455	Isogeraniol*				1258.08	35.602	trans-Geraniol
1209.72	30.563	trans-Piperitol*	Om14		1258.08	35.602	trans-Geraniol	Om22		1257.87	35.5767	trans-Geraniol	OM22			33.966	β-Citral				1273.11	37.168	α-Citral
1215.31	31.145	p-Menth-1-en-9-al*	Om15		1273.11	37.168	α-Citral	Om23		1268.33	36.671	α-Citral	OM23			34.732	Chrysanthenone*				1292.25	39.162	Indole
1219.48	31.58	cis-Carveol	Om16	ok	1281.13	38.004	2-Caren-10-al* α-Thujenal	Om24		1284.93	38.404	α-Thujenal*	OM24			35.602	trans-Geraniol				1281	38.004	α-Thujenal
1230.38	32.716	cis-Geraniol	Om17		1297.94	39.755	Thymol	Om25		1300.36	40.0053	p-Mentha-1(7),8(10)-dien-9-ol*	OM25			36.678	Prenyl acetate*				1297.94	39.755	p-Thymol
1232.57	32.944	β-Citronellol	Om18		1298.66	39.82	Carvacrol*	Om26		1305	40.6347	Carvacrol	OM26			37.168	α-Citral				1298.66	39.82	Carvacrol*
1236.49	33.352	Methyl thymyl ether	Om19		1733.01	77.395	E,E-Farnesal*	Om27		1754.9	77.734	E,E-Farnesal	OM27			38.004	2-Caren-10-al* α-Thujenal				1306.14	40.657	Methyl geranate
1067.55	18.671	cis-β-Terpineol*	Om2													39.162	Indole				1311.25	41.228	Undecanal
1237.48	33.455	Isogeraniol*	Om20		1335.47	43.935	δ-Elemene	Sh1		1334.88	43.873	Ylangene*	SH1			39.755	Thymol				1335.47	43.935	δ-Elemene
1242.38	33.966	β-Citral	Om21		1336	43.995	α-Cubebene*	Sh2		1336.23	44.0203	δ-Elemene	SH2			39.82	Carvacrol*				1336	43.995	α-Cubebene*
1258.08	35.602	trans-Geraniol	Om22		1370.66	47.87	Copaene*	Sh3		1347.05	45.228	α-Cubebene	SH3			40.51	Tridecane				1340.76	44.527	Methyl anthranilate
1273.11	37.168	α-Citral	Om23		1392.25	50.283	β-Elemene	Sh4		1366.64	47.4223	Copaene	SH4			40.657	Methyl geranate				1347.23	45.25	Citronellyl l acetate*
1281.13	38.004	α-Thujenal	Om24		1398.23	50.952	(-)-Zingiberene*	Sh5		1378.62	48.756	β-Bourbonene	SH5			41.228	Undecanal				1370.22	47.821	Nerol acetate
1298.66	39.82	Carvacrol*	Om26		1406.86	51.925	Bergamotene*	Sh6		1393.02	50.372	β-Elemene	SH6			43.935	δ-Elemene				1370.66	47.87	Copaene*
1733.01	77.395	E,E-Farnesal*	Om27		1407.73	52.023	trans-α-Bergamotene	Sh7		1408.67	52.1277	Zingiberene*	SH7			43.995	α-Cubebene*				1389.8	50.01	Geranyl acetate
1075.74	19.203	cis-Linaloloxide*	Om3		1412.39	52.55	Caryophyllene	Sh8		1414.87	52.8267	Caryophyllene	SH8			44.527	Methyl anthranilate				1392.25	50.283	β-Elemene
1107.81	21.465	Linalool	Om4		1417.25	53.099	α-Santalene*	Sh9		1419.47	53.345	(Z)-α-Bergamotene*	SH9			45.25	Citronellyl propionate*				1394.79	50.603	cis-Jasmone
1136.62	23.992	Limonene oxide, cis	Om5		1422.44	53.686	β-Cubebene	Sh10		1422.92	53.744	β-Cubebene	SH10			47.821	Nerol acetate				1398.23	50.952	(-)-Zingiberene*
1138.54	24.16	Limonene oxide, trans	Om6		1430.9	54.642	γ-Elemene	Sh11		1425.84	54.066	α-Elemene*	SH11			47.87	Copaene*				1406.86	51.925	Bergamotene*
1155.28	25.628	Citronellal	Om7	ok	1434.61	55.061	α-Bergamotene	Sh12		1430.88	54.6407	Aromadendrene	SH12			50.01	Geranyl acetate				1407.73	52.023	trans-α-Bergamotene
1175.67	27.416	Umbellulone*	Om8		1445	56.235	α-Caryophyllene	Sh13		1432.57	54.831	g-Elemene*	SH13			50.283	β-Elemene				1412.39	52.55	Caryophyllene
1176.66	27.503	(-)-Terpinen-4-ol	Om9		1455.82	57.458	Epi-bicyclosesquiphellandrene*	Sh14		1435.4	55.1497	α-Guaiene*	SH14			50.903	cis-Jasmone				1417.25	53.099	α-Santalene*
1525.22	68.699	Nerolidol	Os1		1461.26	58.072	β-Farnesene	Sh15		1440.71	55.751	α-Himachalene*	SH15			50.952	(-)-Zingiberene*				1422.44	53.686	β-Cubebene
1530.31	69.721	Caryophyllene oxide	Os2		1463.81	58.36	α-Gurjunene*	Sh16		1449.65	56.764	α-Caryophyllene	SH16			51.925	Bergamotene*				1430.9	54.642	γ-Elemene
1657.62	75.428	β-Eudesmol*	Os3		1470.01	59.061	α-Elemene*	Sh17		1451.95	57.023	Allo-aromadendrene	SH17			52.023	trans-α-Bergamotene				1434.61	55.061	α-Bergamotene
1688.99	76.91	Tetradecanal*	Os4		1473.91	59.502	Germacrene D	Sh18		1456.14	57.4677	Bicyclosesquiphellandrene*	SH18			52.55	Caryophyllene				1445	56.235	α-Caryophyllene
1734.12	77.412	Farnesol	Os5		1475.35	59.665	β-Eudesmene*	Sh19		1457.17	57.599	β-Santalene*	SH19			53.099	α-Santalene*				1455.82	57.458	(+)-Epi-bicyclosesquiphellandrene*
1764.97	77.884	α-Sinensal	Os6		1477.71	59.931	α-Selinene*	Sh20		1462.3	58.1933	β-Farnesene	SH20			53.686	β-Cubebene				1461.26	58.072	β-Farnesene
1335.47	43.935	δ-Elemene	Sh1	ok	1480.79	60.279	Allo-Aromadendrene	Sh21		1470.44	59.11	γ-Selinene*	SH21			54.642	γ-Elemene				1463.81	58.36	α-Gurjunene*
1422.44	53.686	β-Cubebene	Sh10	ok	1489.11	61.219	Bicyclogermacrene	Sh22		1474.51	59.5707	Germacrene D	SH22			55.061	α-Bergamotene				1470.01	59.061	α-Elemene*
1430.9	54.642	γ-Elemene	Sh11	ok	1491.17	61.252	Germacrene B*α-Muurolene	Sh23		1478.32	60.002	β-Selinene	SH23			56.235	α-Caryophyllene				1473.91	59.502	Germacrene D
1434.61	55.061	α-Bergamotene	Sh12		1496.23	62.024	α-Bulnesene*	Sh24		1481.24	60.3313	γ-Himachalene	SH24			57.458	Epi-bicyclosesquiphellandrene*				1475.35	59.665	β-Eudesmene*
1445	56.235	α-Caryophyllene	Sh13	ok	1499.31	62.372	(Z,E)-α-Farnesene	Sh25		1487.7	61.06	α-Selinene	SH25			58.072	β-Farnesene				1477.71	59.931	α-Selinene*
1455.82	57.458	Epi-bicyclosesquiphellandrene*	Sh14		1502.39	63.024	γ-Muurolene	Sh26		1493.1	61.671	δ-Guaiene*	SH26			58.36	α-Gurjunene*				1480.79	60.279	Allo-Aromadendrene
1461.26	58.072	β-Farnesene	Sh15	ok	1502.66	63.328	α-Farnesene*δ-Cadinene	Sh27		1496.19	62.018	α-Muurolene	SH27			59.061	α-Elemene*				1489.11	61.219	Bicyclogermacrene
1463.81	58.36	α-Gurjunene*	Sh16		1504.02	63.415	β-Bisabolene	Sh28		1496.97	62.035	β-Gurjunene	SH28			59.502	Germacrene D				1491.17	61.252	α-Muurolene*
1470.01	59.061	α-Elemene*	Sh17	ok	1505.77	63.834	α-Farnesene*δ-Cadinene	Sh29		1500.17	62.491	α-Bulnesene*	SH29			59.665	β-Eudesmene*				1496.23	62.024	α-Bulnesene*
1473.91	59.502	Germacrene D	Sh18		1507.2	64.877	β-Sesquiphellandrene	Sh30		1501.08	62.714	β-Cadinene	SH30			59.931	α-Selinene*				1499.31	62.372	(Z,E)-α-Farnesene
1475.35	59.665	β-Eudesmene*	Sh19		1510.3	64.921	Eudesma-3,7(11)-diene*	Sh31		1501.79	62.877	cis-α-Bisabolene*	SH31			60.279	Allo-Aromadendrene				1502.39	63.024	γ-Muurolene
1336	43.995	α-Cubebene*	Sh2		1519.7	67.176	cis-α-Bisabolene*	Sh32		1503.46	63.279	α-Amorphene	SH32			61.219	Bicyclogermacrene				1502.66	63.328	α-Farnesene*
1477.71	59.931	α-Selinene*	Sh20	de	1826.94	78.711	β-Gurjunene	Sh33		1503.63	63.3213	γ-Muurolene	SH33			61.252	Germacrene B*α-Muurolene				1504.02	63.415	β-Bisabolene
1480.79	60.279	Allo-Aromadendrene	Sh21							1504.67	63.567	β-Bisabolene	SH34			62.024	α-Bulnesene*				1505.77	63.834	δ-Cadinene
1489.11	61.219	Bicyclogermacrene	Sh22		1530.22	69.699	Nerolidol	Os1		1505.67	63.807	α-Farnesene*	SH35			62.372	(Z,E)-α-Farnesene				1507.2	64.877	β-Sesquiphellandrene
1491.17	61.252	Germacrene B*α-Muurolene	Sh23		1530.31	69.721	Caryophyllene oxide	Os2		1508.96	64.6	δ-Cadinene	SH36			62.731	Pentadecane				1510.3	64.921	Eudesma-3,7(11)-diene*
1496.23	62.024	α-Bulnesene*	Sh24		1657.62	75.428	β-Eudesmol*	Os3		1510.25	64.905	β-Sesquiphellandrene	SH37			63.024	γ-Muurolene				1519.7	67.176	cis-α-Bisabolene*
1499.31	62.372	(Z,E)-α-Farnesene	Sh25		1688.99	76.51	Tetradecanal*	Os4		1511.88	65.301	8-Isopropenyl-1,5-dimethyl-cyclodeca-1,5-diene*	SH38			63.328	α-Farnesene*δ-Cadinene				1530.22	69.699	Nerolidol
1502.39	63.024	γ-Muurolene	Sh26		1734.12	77.412	Farnesol	Os5		1514.13	65.356	Valencen	SH39			63.415	β-Bisabolene				1532.31	69.721	Caryophyllene oxide
1503.06	63.328	α-Farnesene*δ-Cadinene	Sh27		1764.97	77.884	α-Sinensal	Os6		1514.8	66.0027	Eudesma-3,7(11)-diene*	SH40			63.834	α-Farnesene*δ-Cadinene				1534.63	70.758	Pentadecane, 3-methyl-*
1504.02	63.415	β-Bisabolene	Sh28							1525.64	68.601	α-Panasinsene*	SH41			64.877	β-Sesquiphellandrene				1657.62	75.428	β-Eudesmol*
1505.77	63.834	α-Farnesene*δ-Cadinene	Sh29		1124.73	22.25	Chrysanthenone*	K1		1531.94	69.9247	(E,Z)- α-Farnesene	SH42			64.921	Eudesma-3,7(11)-diene*				1665.33	75.694	Methyl jasmonate*
1370.66	47.87	Copaene*	Sh3		1394.79	50.603	cis-Jasmone	K2		1643.48	74.9383	Cadalene*	SH43			67.176	cis-α-Bisabolene*				1680.46	76.216	Hexadecane, 2-methyl-*
1507.2	64.877	β-Sesquiphellandrene	Sh30													69.699	Nerolidol				1688.81	76.504	8-Heptadecene
1510.3	64.921	Eudesma-3,7(11)-diene*	Sh31		1268.41	36.678	Prenyl acetate*	E1		1530.14	69.684	Nerolidol-2	OS1			69.721	Caryophyllene oxide				1693.99	76.95	Tetradecanal*
1519.7	67.176	cis-α-Bisabolene*	Sh32		1306.14	40.657	Methyl geranate	E2		1531.01	69.894	Germacrene D-4-ol	OS2			70.758	Pentadecane, 3-methyl-*				1733.01	77.395	E,E-Farnesal*
1826.94	78.711	β-Gurjunene	Sh33		1347.23	45.25	Citronellyl propionate*	E3		1587.2	70.3653	Caryophyllene oxide	OS3			73.819	Hexadecane				1734.12	77.412	Farnesol
1392.25	50.283	β-Elemene	Sh4		1370.22	47.821	Nerol acetate	E4		1592.04	71.525	α-Humulene oxide*	OS4			75.428	β-Eudesmol*				1764.97	77.884	α-Sinensal
1398.23	50.952	(-)-Zingiberene*	Sh5		1389.8	50.01	Geranyl acetate	E5		1613.62	73.913	Cubenol*	OS5			75.694	Methyl jasmonate*				1808.8	78.515	Octadecane, 2-methyl*
1406.86	51.925	Bergamotene*	Sh6							1626.16	74.743	Spathulenol	OS6			76.216	Hexadecane, 2-methyl-*
1407.73	52.023	trans-α-Bergamotene	Sh7		896.788	9.376	Styrene*	Ah1		1657.32	75.422	β-Eudesmol	OS7			76.504	8-Heptadecene
1412.39	52.55	Caryophyllene	Sh8		1091.38	20.22	α,p-Dimethylstyrene	Ah2		1764.71	77.879	α-Sinensal	OS8			76.51	Tetradecanal*
1417.25	53.099	α-Santalene*	Sh9		1159.86	26.03	Naphthalene*	Ah3								77.015	Heptadecane
					1139.6	24.253	Benzyl nitrile	N1		1398.66	51.001	cis-Jasmone*	K1			77.395	E,E-Farnesal*
					1292.25	39.162	Indole	N2		1484.42	60.6943	β-Ionone*	K2			77.412	Farnesol
					1340.76	44.527	Methyl anthranilate	N3								77.711	Heptadecane, 3-methyl-*
					1075.49	19.187	1-Octanol	Ac1		1218.52	31.477	Acetic acid, octyl ester*	E1			77.884	α-Sinensal
					1116.24	22.204	Phenylethyl Alcohol	Ac2		1328.35	43.1397	Methyl geranate	E2			78.515	Octadecane, 2-methyl*
				de	1304.83	40.51	Tridecane	Ak1		1330	43.342	Mrtenyl acetate*	E3			78.711	β-Gurjunene
				de	1501.17	62.731	Pentadecane	Ak2		1360.47	46.729	Citronellol acetate	E4			flower
					1534.63	70.758	Pentadecane, 3-methyl-*	Ak3		1369.77	47.772	Nerol acetate	E5
				de	1610.99	73.819	Hexadecane	Ak4		1397.76	50.8993	Geranyle acetate*	E6
					1680.46	76.216	Hexadecane, 2-methyl-*	Ak5
					1688.81	76.504	8-Heptadecene	Ak6		876.943	8.60967	Styrene*	Ah1
				de	1708.17	77.015	Heptadecane	Ak7		1176.4	27.482	Naphthalene*	Ah2
				de	1753.66	77.711	Heptadecane, 3-methyl-*	Ak8		996.01	13.806	Phenol*	P1
					1808.8	78.515	Octadecane, 2-methyl*	Ak9		1297.7	39.726	p-Thymol*	P2
					1665.33	75.694	Methyl jasmonate*	DFG		1075.69	19.203	1-Octanol	Ac1
										1291.94	39.1317	Phenyl-but-3-en-1-ol*	Ac2
										1171.61	27.063	Vinylcyclohexane*	U1
										1377.64	48.653	1-Decen-3-yne*	U2
										1285.6	38.467	Indole	ND

## Sheet: for paper2013822
			Ponkan			Satsuma			Liubencheng			Qingjia			Lemon			Bergarmot			Yuhuanyou			Zaoxiangyou			Huyou
RIa	Compounds	FCc	Ponkan-Ue	Ponkan-H	Ponkan-F	Satsuma-U	Satsuma-H	Satsuma-F	Liubencheng-U	Liubencheng-H	Liubencheng-F	Qingjia -U	Qingjia-H	Qingjia-F	Lemon-U	Lemon-H	Lemon-F	Bergarmot-U	Bergarmot-H	Bergarmot-F	Yuhuanyou-U	Yuhuanyou-H	Yuhuanyou-F	Zaoxiangyou-U	Zaoxiangyou-H	Zaoxiangyou-F	Huyou-U	Huyou-H	Huyou-F	I Md	; T: Trace (<0 .1 %), M: moderate (between 0.1% to < 1%).
808.912	Hexanal	A1	M	M	-g	-	-	-	-	-	-	-	-	M	M	M	M	-	-	M	M	M	M	M	M	M	3.43859	M	M	RI, MS
858.342	2-Hexenal*	A2	M	-	M	2.84266	1.84131	M	2.36084	1.68436	1.18828	1.51037	1.20441	1.86282	1.3299	1.44685	M	M	M	M	M	M	1.68143	M	M	1.24394	5.95275	1.51984	M	RI, MS
977.267	Benzaldehyde	A3	T	T	M	T	M	T	T	T	T	-	-	M	T	T	T	-	-	-	-	T	T	-	-	-	M	T	-	RI, ST, MS
1047.63	Benzeneacetaldehyde*	A4	M	M	1.07755	-	-	-	M	M	M	-	M	1.31153	-	M	M	-	-	-	-	-	1.33903	-	-	-	M	M	M	RI, MS
1109.17	Nonanal	A5	-	-	-	-	-	-	-	-	-	-	-	-	-	-	-	M	M	M	-	-	-	-	-	-	-	-	-	RI, MS
1154.36	Lilac aldehyde B*	A6	-	-	-	-	-	T	-	T	T	-	T	-	-	-	-	-	-	-	M	T	-	M	T	T	-	-	T	RI, MS
1201.85	Myrtenal	A7	-	-	-	M	M	-	-	-	-	T	-	-	-	-	-	-	-	-	-	T	-	T	-	T	-	T	-	RI, MS
1213.53	Decanal	A8	T	T	T	T	T	-	-	-	-	T	T	-	M	M	T	-	-	-	M	M	-	T	-	-	-	T	M	RI, MS
1311.25	Undecanal	A9	-	-	-	-	-	-	-	-	-	-	-	-	T	-	M	T	T	T	-	-	-	-	-	-	-	-	-	RI, MS
	Monoterpene hydrocarbons
938.506	α-Thujene	Mh1	M	M	M	M	M	M	M	M	M	M	M	M	T	T	M	M	M	M	-	T	2.18061	T	T	T	M	M	M
945.025	α-Pinene	Mh2	M	M	M	1.07716	2.79759	M	M	M	M	M	M	1.41559	M	M	M	M	M	M	M	M	M	M	M	M	1.56796	2.28272	M	RI, ST, MS
962.19	Camphene	Mh3	-	-	-	-	-	-	-	-	-	-	-	-	-	-	-	-	-	-	-	-	-	T	4.4809	-	-	T	-	RI, MS
979	Sabinene	Mh4	-	-	-	-	-	-	11.1478	6.07465	6.11305	-	-	-	-	-	-	-	-	-	-	-	-	-	-	-	-	-	-	RI, MS
991.358	β-Pinene	Mh5	9.19671	7.83074	6.59203	2.91868	3.91009	6.50737	-	-	-	11.877	7.98408	3.52689	2.06658	M	1.11103	M	M	M	3.38449	1.67447	2.42243	7.49493	-	4.89704	5.88723	8.07932	6.83964	RI, ST, MS
999.253	β-Myrcene	Mh6	1.45703	1.38399	1.10774	-	2.55319	1.53196	2.53063	1.82057	1.48383	2.45558	1.72919	1.61858	2.00936	2.02242	2.42121	1.40395	1.50089	1.53462	8.08015	4.15467	1.55188	M	M	M	2.03989	1.95396	15.4996	RI, ST, MS
1018.22	α-Terpinene	Mh7	M	M	M	M	M	M	M	-	M	1.61731	-	M	-	-	-	M	M	M	T	T	M	-	-	-	M	M	M	RI, ST, MS
1025.4	p-Cymene	Mh8	M	M	M	8.56187	6.52588	-	-	-	-	-	-	M	-	-	-	-	-	-	-	-	1.01133	-	-	-	2.90872	-	-	RI, ST, MS
1029.08	Limonene	Mh9	1.47639	1.14976	1.07066	-	-	1.69343	3.24865	1.75041	1.54238	4.6449	2.69146	2.40657	51.9877	44.9509	52.5299	29.3014	27.2451	36.1717	3.32176	2.19312	3.68356	4.91845	2.54014	3.32177	6.67903	10.0866	7.05058	RI, ST, MS
1040.12	(Z)-Ocimene	Mh10	T	-	-				-	-	-	M	-	1.71294	M	M	-	1.00992	1.10099	1.24656	M	M	-	M	M	M	T	6.78338	16.5211	RI, ST, MS
1044.08	(E)-Ocimene	Mh11	3.03487	2.28608	2.16217	6.37089	6.31683	2.27423	1.62409	1.17729	1.39001	2.95456	1.5362	8.39802	6.14331	5.34704	6.34976	2.73522	2.56446	2.95913	6.41254	3.22858	1.97352	9.13852	5.45243	8.328	4.90086	-	-	RI, ST, MS
1060.45	γ-Terpinene	Mh12	1.89585	1.43803	1.62769	13.789	8.91289	M	M	M	M	M	M	M	2.59692	1.96621	3.16562	3.67821	3.71182	4.28804	M	T	11.0595	T	T	T	18.0731	22.8304	T	RI, ST, MS
1083.94	β-Cymene*	Mh13	-	-	-	-	-	-	-	-	-	-	-	-	-	-	-	-	-	-	-	-	-	-	-	-	-	-	T	RI, ST, MS
1090.29	Terpinolene	Mh14	-	-	-	-	-	-	M	M	M	M	M	M	M	M	-	M	M	M	-	-	-	-	-	-	1.06591	1.59334	M	RI, ST, MS
1127.77	1,3,8-p-Menthatriene*	Mh15	-	-	-	-	-	-	-	-	-	-	-	-	T	T	T	-	-	-	-	-	-	T	-	T	-	-	T	RI, MS
1131.17	2,4,6-Octatriene,3,4-dimethyl*	Mh16	M	M	M	M	M	T	M	M	T	M	M	M	T	M	M	1.16234	1.04968	1.34855	M	M	T	M	M	M	M	M	M	RI, MS
	Oxygenated Monoterpenes
1030.75	1,8-Cineol	Om1	-	-	-	6.04778	3.15155	-	-	-	-	-	-	-	-	-	-	-	-	-	-	-	-	-	-	-	-	-	-	RI, MS
1067.55	cis-β-Terpineol*	Om2	1.98719	1.64544	1.07579	M	M	M	3.6033	1.81398	M	2.93001	1.76945	-	M	T	T	M	M	M	T	T	M	T	T	T	M	M	T	RI, MS
1075.74	cis-Linaloloxide*	Om3	-	-	-	-	-	-	-	T	-	-	-	M	-	-	-	-	-	-	M	M	T	M	M	M	-	-	-	RI, MS
1107.81	Linalool	Om4	46.7618	50.4261	47.743	22.6702	17.4096	42.7613	44.7447	42.9086	46.9808	29.1503	36.1069	24.9546	7.95347	6.87941	3.93728	1.45293	1.71748	1.58667	54.4069	56.1551	21.5886	36.4404	53.5546	48.4262	18.8301	10.1012	30.1068	RI, ST, MS
1136.62	Limonene oxide, cis	Om5	-	-	-	-	-	-	-	-	-	-	-	-	-	-	-	-	-	-	-	T	1.14602	-	-	-	-	-	T	RI, ST, MS
1138.54	Limonene oxide, trans	Om6	-	-	-	-	-	-	-	-	-	-	-	-	2.58172	-	3.0419	1.63151	2.19048	2.78279	-	-	-	-	-	-	-	-	-	RI, ST, MS
1155.28	Citronellal	Om7	M	M	M	-	-	M	M	M	M	M	M	M	1.05332	M	M	M	M	M	M	M	M	T	T	T	M	M	T	RI, ST, MS
1175.67	Umbellulone*	Om8	-	T	-	-	-	-	-	-	-	-	-	-	-	-	-	-	-	-	-	-	-	-	-	-	-	-	-	RI, MS
1176.66	Terpinen-4-ol	Om9	M	M	M	M	M	M	M	M	M	M	M	M	M	-	M	T	T	T	M	M	M	M	M	M	M	M	T	RI, ST, MS
1189.37	p-Cymen-8-ol*	Om10	M	M	T	M	M	-	-	-	-	-	-	-	-	-	-	-	-	-	-	-	-	-	-	-	-	-	-	RI, MS
1192.41	α-Terpineol	Om11	3.83474	2.94371	1.95647	5.449	5.58377	1.00613	4.58555	2.59722	1.11974	4.37412	2.8318	M	1.53736	-	-	2.38789	2.72316	1.96824	-	M	-	M	M	-	2.7272	M	M	RI, ST, MS
1205.13	trans-Dihydrocarvone*	Om12	-	-	-	-	-	-	-	-	-	-	-	-	M	M	M	-	-	-	-	-	-	-	-	-	-	-	-	RI, MS
1208.45	Carvone*	Om13	-	-	-	-	-	-	-	-	-	-	-	-	-	-	-	T	T	T	-	-	-	-	-	-	-	-	T	RI, ST, MS
1209.72	trans-Piperitol*	Om14	-	-	-	-	-	-	-	-	-	-	-	-	-	-	-	-	-	-	-	-	-	-	-	-	-	-	T	RI, MS
1215.31	p-Menth-1-en-9-al*	Om15	T	T	M	M	-	-	-	-	-	-	-	-	-	M	M	-	-	-	-	-	-	M	M	M	-	-	-	RI, MS
1219.48	cis-Carveol	Om16	-	-	-	1.00474	M	M	-	-	-	T	-	-	M	M	M	M	M	1.15484	T	T	-	T	T	T	-	T	T	RI, MS
1230.38	cis-Geraniol	Om17	-	-	-	-	-	M	M	M	M	M	M	M	M	T	M	M	-	-	1.18728	2.14899	M	1.37315	2.84169	2.4586	M	M	1.0076	RI, ST, MS
1232.57	β-Citronellol	Om18	T	M	M	-	-	M	M	M	T	M	M	M	T	T	-	-	-	-	-	-	M	-	-	-	T	M	M	RI, ST, MS
1236.49	Methyl thymyl ether	Om19	1.93011	1.19425	1.07201	-	-	-	-	-	-	M	5.7352	T	T	T	T	-	-	-	-	-	-	-	-	-	-	-	-	RI, MS
1237.48	Isogeraniol*	Om20	-	-	-	-	-	-	-	-	-	-	-	-	-	-	-	-	-	-	-	-	-	-	T	T	-	-	T	RI, MS
1242.38	β-Citral	Om21	T	T	M	-	-	M	M	M	M	M	M	2.55117	M	M	M	17.7533	17.1002	13.2708	1.51708	2.28099	1.63756	M	1.02783	M	M	M	-	RI, ST, MS
1258.08	trans-Geraniol	Om22	M	1.12428	2.46576	M	-	-	T	-	-	T	M	6.79571	-	-	-	M	M	M	M	1.82372	6.52059	M	1.20381	1.24124	M	2.44986	M	RI, ST, MS
1273.11	α-Citral	Om23	M	T	T	-	-	M	M	M	M	M	11.1707	3.30091	1.23675	M	M	25.8074	24.4963	20.0745	1.83435	3.06751	2.39626	M	1.18693	M	M	1.38467	M	RI, ST, MS
1281.94	α-Thujenal	Om24	-	-	-	M	1.33405	M	-	-	-	-	-	-	-	-	-	-	-	-	-	-	-	-	-	-	-	-	-	RI, MS
1298.66	Carvacrol*	Om25	-	-	-	-	-	-	-	-	-	-	-	-	-	-	M	-	-	-	-	-	-	-	-	-	-	-	-	RI, ST, MS
1733.01	E,E-Farnesal*	Om26	-	-	-	-	-	M	-	-	-	-	-	-	T	-	M	T	M	T	-	-	M	M	M	M	-	M	M	RI, ST, MS
	Sesquiterpene hydrocarbons
1335.47	δ-Elemene	Sh1	1.35716	M	1.36071	-	-	-	-	-	-	-	-	M	M	-	-	-	-	-	1.01612	M	1.23277	M	M	M	1.13737	M	1.05489	RI, MS
1336	α-Cubebene*	Sh2	T	T	T	-	-	-	-	-	-	-	-	-	M	T	T	-	-	-	-	-	-	-	-	-	-	T	T	RI, MS
1370.66	Copaene*	Sh3	-	-	-	-	-	-	-	-	-	-	-	-	-	M	M	-	-	-	-	-	-	-	-	-	M	-	-	RI, MS
1392.25	β-Elemene	Sh4	M	-	T	5.39806	4.75755	2.12873	1.9338	M	1.46837	19.4297	3.09307	5.73369	-	7.52828	6.01816	-	-	-	-	M	4.98424	M	M	2.24784	M	4.4793	M	RI, MS
1398.23	Zingiberene*	Sh5	-	-	M	-	-	-	-	-	-	-	-	-	-	-	-	-	-	-	-	-	M	-	-	-	-	M	T	RI, MS
1406.86	Bergamotene*	Sh6	-	-	-	-	-	-	-	-	-	T	T	M	T	-	-	-	-	-	-	-	-	M	-	-	M	-	-	RI, MS
1407.73	trans-α-Bergamotene	Sh7	M	T	-	-	-	M	M	M	T	-	-	-	-	T	T	-	-	-	-	-	-	-	-	-	-	-	-	RI, MS
1412.39	Caryophyllene	Sh8	M	M	M	2.11493	2.60631	-	M	M	M	1.01992	M	1.33847	3.50293	3.93122	3.13974	1.83392	1.98547	1.79272	1.13495	0.695284	2.18462	T	-	T	2.30761	2.97985	1.99819	RI, ST, MS
1417.25	α-Santalene*	Sh9	-	-	-	-	-	-	-	-	-	-	-	-	-	T	T	T	T	T	-	-	-	-	-	-	-	-	-	RI, MS
1422.44	β-Cubebene	Sh10	T	T	T	-	M	M	-	-	-	-	-	0.560266	T	-	T	T	T	T	0.0758665	0.0558636	0.253118	-	1.64138	-	M	M	M	RI, MS
1430.9	γ-Elemene	Sh11	1.161	M	1.06251	M	M	M	-	-	-	-	-	1.37336	T	T	T	-	-	-	M	M	1.76608	-	T	M	2.47979	1.44341	M	RI, MS
1434.61	α-Bergamotene	Sh12	-	-	-	-	-	3.99631	-	-	-	-	-	-	-	2.21785	1.78313	M	M	M	-	-	T	-	-	-	-	T	-	RI, MS
1445	α-Caryophyllene	Sh13	-	-	-	-	-	-	M	-	-	-	-	-	-	M	M	-	-	-	-	-	-	-	-	-	-	-	-	RI, MS
1455.82	Epi-bicyclosesquiphellandrene*	Sh14	M	M	M	-	-	-	M	M	-	M	M	M	-	-	-	T	T	T	-	T	-	M	M	T	-	-	T	RI, MS
1461.26	β-Farnesene	Sh15	3.5302	2.23924	3.04146	-	-	-	3.88972	3.5562	2.69441	2.0307	2.24958	3.4335	1.88252	2.26035	1.64302	M	M	M	T	M	5.16399	T	-	-	M	4.60125	T	RI, MS
1463.81	α-Gurjunene*	Sh16	-	-	-	-	-	-	-	-	-	-	-	-	-	-	-	-	-	-	-	-	-	-	-	-	-	T	-	RI, MS
1470.01	α-Elemene*	Sh17	-	-	-	-	-	-	-	-	-	-	-	-	-	T	T	-	-	-	-	-	M	-	-	-	-	-	T	RI, MS
1473.91	Germacrene D	Sh18	M	M	T	M	M	T	-	-	-	-	-	1.36054	M	M	M	M	M	M	M	M	1.17092	-	M	M	2.23534	1.52291	1.13977	RI, MS
1475.35	β-Eudesmene*	Sh19	-	-	-	-	-	-	-	-	-	-	T	-	M	M	M	-	-	-	-	-	-	-	-	-	-	M	-	RI, MS
1477.71	α-Selinene*	Sh20	-	-	-	T	M	-	-	-	-	-	-	M	-	-	M	-	-	-	-	-	M	-	-	-	2.03825	-	-	RI, MS
1480.79	Allo-Aromadendrene	Sh21	-	-	-	-	-	-	-	T	-	-	-	-	M	M	M	-	-	-	-	-	-	-	-	-	-	-	T	RI, MS
1489.11	Bicyclogermacrene	Sh22	-	-	-	M	M	T	-	-	-	T	-	-	-	-	-	-	-	-	T	M	-	M	M	M	-	-	-	RI, MS
1491.17	α-Muurolene*	Sh23	-	M	M	-	-	-	-	-	-	-	-	-	-	-	-	-	-	-	-	-	M	-	-	T	-	-	-	RI, MS
1496.23	α-Bulnesene*	Sh24	T	-	M	-	-	-	-	T	-	-	-	-	M	M	M	-	-	-	-	-	T	-	-	-	-	T	-	RI, MS
1499.31	(Z,E)-α-Farnesene	Sh25	-	-	-	-	-	-	-	-	-	-	-	-	M	M	-	-	-	-	-	T	-	M	M	-	-	-	T	RI, MS
1502.39	γ-Muurolene	Sh26	-	-	-	-	-	-	-	-	-	-	-	-	-	-	-	-	-	-	-	-	T	T	-	-	-	M	M	RI, MS
1502.66	α-Farnesene*	Sh27	-	-	M	-	-	-	-	-	-	-	-	T	M	M	M	-	-	-	-	-	-	-	-	-	-	M	M	RI, ST, MS
1504.02	β-Bisabolene	Sh28	-	-	-	-	-	-	-	-	-	-	-	-	2.42028	2.82445	2.33794	1.53883	1.63332	1.47157	-	-	-	-	-	-	-	-	-	RI, MS
1505.77	δ-Cadinene	Sh29	2.16629	1.29828	1.67464	-	-	-	M	1.07072	M	M	M	-	-	-	-	-	-	-	M	M	-	1.12782	M	M	-	-	M	RI, MS
1507.2	β-Sesquiphellandrene	Sh30	M	-	M	4.31201	6.40999	-	M	M	M	M	M	-	T	T	T	-	-	-	-	-	M	-	-	-	M	M	-	RI, MS
1510.3	Eudesma-3,7(11)-diene*	Sh31	-	-	-	-	-	-	-	-	-	-	-	M	-	-	-	-	-	-	-	-	-	-	-	-	-	T	T	RI, MS
1519.7	cis-α-Bisabolene*	Sh32	-	-	-	-	-	-	-	-	-	-	-	-	T	-	T	M	M	M	-	-	T	-	-	-	-	-	-	RI, MS
	Oxygenated Sesquiterpenes							-
1530.22	Nerolidol	Os1	M	M	T	-	-	M	M	3.03976	3.6431	M	1.74133	-	-	M	T	M	1.44203	M	3.56875	4.03517	M	6.93535	7.47424	8.75136	M	M	T	RI, MS
1532.31	Caryophyllene oxide	Os2	-	-	-	-	-	M	-	-	-	-	-	-	-	-	-	T	M	T	-	-	-	-	-	-	-	T	4.80515	RI, MS
1657.62	β-Eudesmol*	Os3	T	T	-	-	-	-	-	-	-	-	-	-	-	-	-	-	-	-	-	-	-	-	-	-	T	T	-	RI, MS
1695.99	Tetradecanal*	Os4	-	-	-	-	-	-	-	-	-	-	-	M	-	-	-	-	-	-	-	-	-	-	-	-	-	-	T	RI, MS
1734.12	Farnesol	Os5	-	M	M	M	1.07319	M	M	1.54425	M	1.41173	1.10812	-	M	M	M	M	M	M	1.31867	1.7325	M	2.37528	2.28174	1.99796	M	M	-	RI, ST, MS
1764.97	α-Sinensal	Os6	M	M	M	-	-	-	-	-	-	M	M	-	-	-	-	-	-	-	-	-	-	-	-	-	-	-	-
	Ketones													-				-	-	-				-	-	-
1124.73	Chrysanthenone*	K1	-	-	-	M	M	-	M	-	-	-	-	-	-	-	-	-	-	-	-	-	-	-	-	-	-	-	-	RI, MS
1394.79	cis-Jasmone	K2	M	M	M	M	1.43512	M	M	M	M	M	M	M	T	M	M	-	-	-	-	-	M	-	-	-	M	M	-	RI, MS
	Esters																	-	-	-							-		-
1306.14	Methyl geranate	E1	-	-	-	M	-	M	1.7876	8.2557	15.8073	-	-	-	M	M	-	-	-	-	M	M	M	M	M	M	-	-	T	RI, MS
1347.23	Citronellyl l acetate*	E2	-	-	-	-	-	-	-	-	-	-	-	-	-	T	T	-	-	-	-	-	-	-	-	-	-	T	T	RI, MS
1370.22	Nerol acetate	E3	-	-	-	-	-	T	T	T	T	T	T	-	-	-	-	T	T	T	M	M	M	M	M	M	-	-	-	RI, MS
1389.8	Geranyl acetate	E4	-	-	-	T	M	-	-	-	-	-	-	-	-	-	-	T	M	M	-	-	-	-	-	-	-	-	-	RI, ST, MS
	Miscellanous								-	-	-													-	-	-	-	-	-
1297.94	p-Thymol	P1	4.96333	4.21413	4.03406	-	M	-	-	-	-	-	-	-	M	1.05212	-	-	-	-	-	-	T	-	-	-	-	-	-	RI, ST, MS
1665.33	Methyl jasmonate*	DFG	-	-	-	-	-	-	-	-	-	-	-	T	-	-	-	-	-	-	T	T	-	-	-	-	-	-	-	RI, MS
1075.49	1-Octanol	Ac1	-	-	-	-	-	-	-	-	-	-	-	-	T	T	T	T	-	T	-	-	-	-	-	-	T	T	T	RI, ST, MS
1116.24	Phenylethyl Alcohol	Ac2	T	M	M	M	M	M	-	M	M	-	T	M	-	-	-	-	-	-	M	M	M	M	M	M	-	M	-	RI, MS
896.788	Styrene*	Ah1	-	-	-	-	-	-	-	-	-	-	-	-	T	-	-	-	-	-	-	-	-	-	-	-	-	-	-	RI, MS
1091.38	α,p-Dimethylstyrene	Ah2	M	M	M	2.16679	1.33356	-	-	-	-	-	-	-	-	-	-	-	-	-	M	M	M	-	-	-	-	-	-	RI, MS
1159.86	Naphthalene*	Ah3	-	-	-	-	-	-	-	-	-	-	-	-	-	-	M	-	-	-	-	-	-	-	-	-	-	-	-	RI, MS
1139.6	Benzyl nitrile	N1	M	2.14365	4.61002	1.98872	3.42912	1.1952	1.01963	1.38301	1.25262	M	M	2.48772	-	-	-	-	-	-	M	M	-	M	M	M	M	-	M	RI, MS
1292.25	Indole	N2	2.27737	3.96007	4.98544	3.6893	5.00391	4.8955	5.27316	10.4119	4.86354	4.45006	6.90811	8.43353	M	1.00923	M	T	M	M	4.78786	5.51044	8.83731	8.15599	7.17985	7.87769	3.71898	4.52386	2.83449	RI, MS
1340.76	Methyl anthranilate	N3	-	M	M	1.11706	4.87295	17.9085	-	-	-	-	-	1.76794	M	2.46675	T	-	-	-	-	4.20299	2.78685	8.21338	-	-	-	-	2.17264	RI, MS
1534.63	Pentadecane, 3-methyl-*	Ak1	-	-	-	-	-	2.56299	-	-	-	M	T	1.14225	-	T	T	-	-	-	-	-	-	-	-	-	-	-	-	RI, MS
1680.46	Hexadecane, 2-methyl-*	Ak2	-	-	-	-	-	T	M	M	M	T	M	-	-	-	-	-	-	-	-	-	-	-	-	-	-	T	-	RI, MS
1688.81	8-Heptadecene	Ak3	2.22847	2.61903	1.7025	M	M	1.25764	1.53754	2.42932	1.74297	M	2.76282	T	M	1.65326	M	M	M	M	-	-	1.02607	-	-	-	1.58976	M	-	RI, MS
1808.8	Octadecane, 2-methyl*	Ak4	T	T	T	-	-	-	M	M	T	M	T	T	-	-	-	-	-	-	-	M	-	M	M	M	-	-	T	RI, MS
Data are arranged according to chemical groups represented in mean percentage of individual flower constituents from triplicate experiments
a Retention Indice; bRetention time, cIdentification Method; dFamily Code. A: Aldehydes; Mh: Monoterpene hydrocarbons; Om: Oxygenated monoterpenes; Sh: Sesquiterpene hydrocarbons; Os: Oxygenated Sesquiterpenes; K: Ketones; E: Esters; P: Phenol; DFG: Diverse functional group; Ac: Alcohol; Ah: Aromatic Hydrocarbons; N: Nitrogen Derivative; Ak: Alkane;
e Flower stages are represented as, U; Unopened flower; H; Half opened flower, F; Fully opened flower, f Standard deviation, g Undetected, and * Represents tentatively identified compounds in flower volatiles
